# Supplementary material for: Spatio-Temporal Patterns of the SARS-CoV-2 Epidemic in Germany
Source: Preprints.org preprint supplement (doi:10.20944/preprints202306.1628.v1), 2023-06-22

Reference State: BB

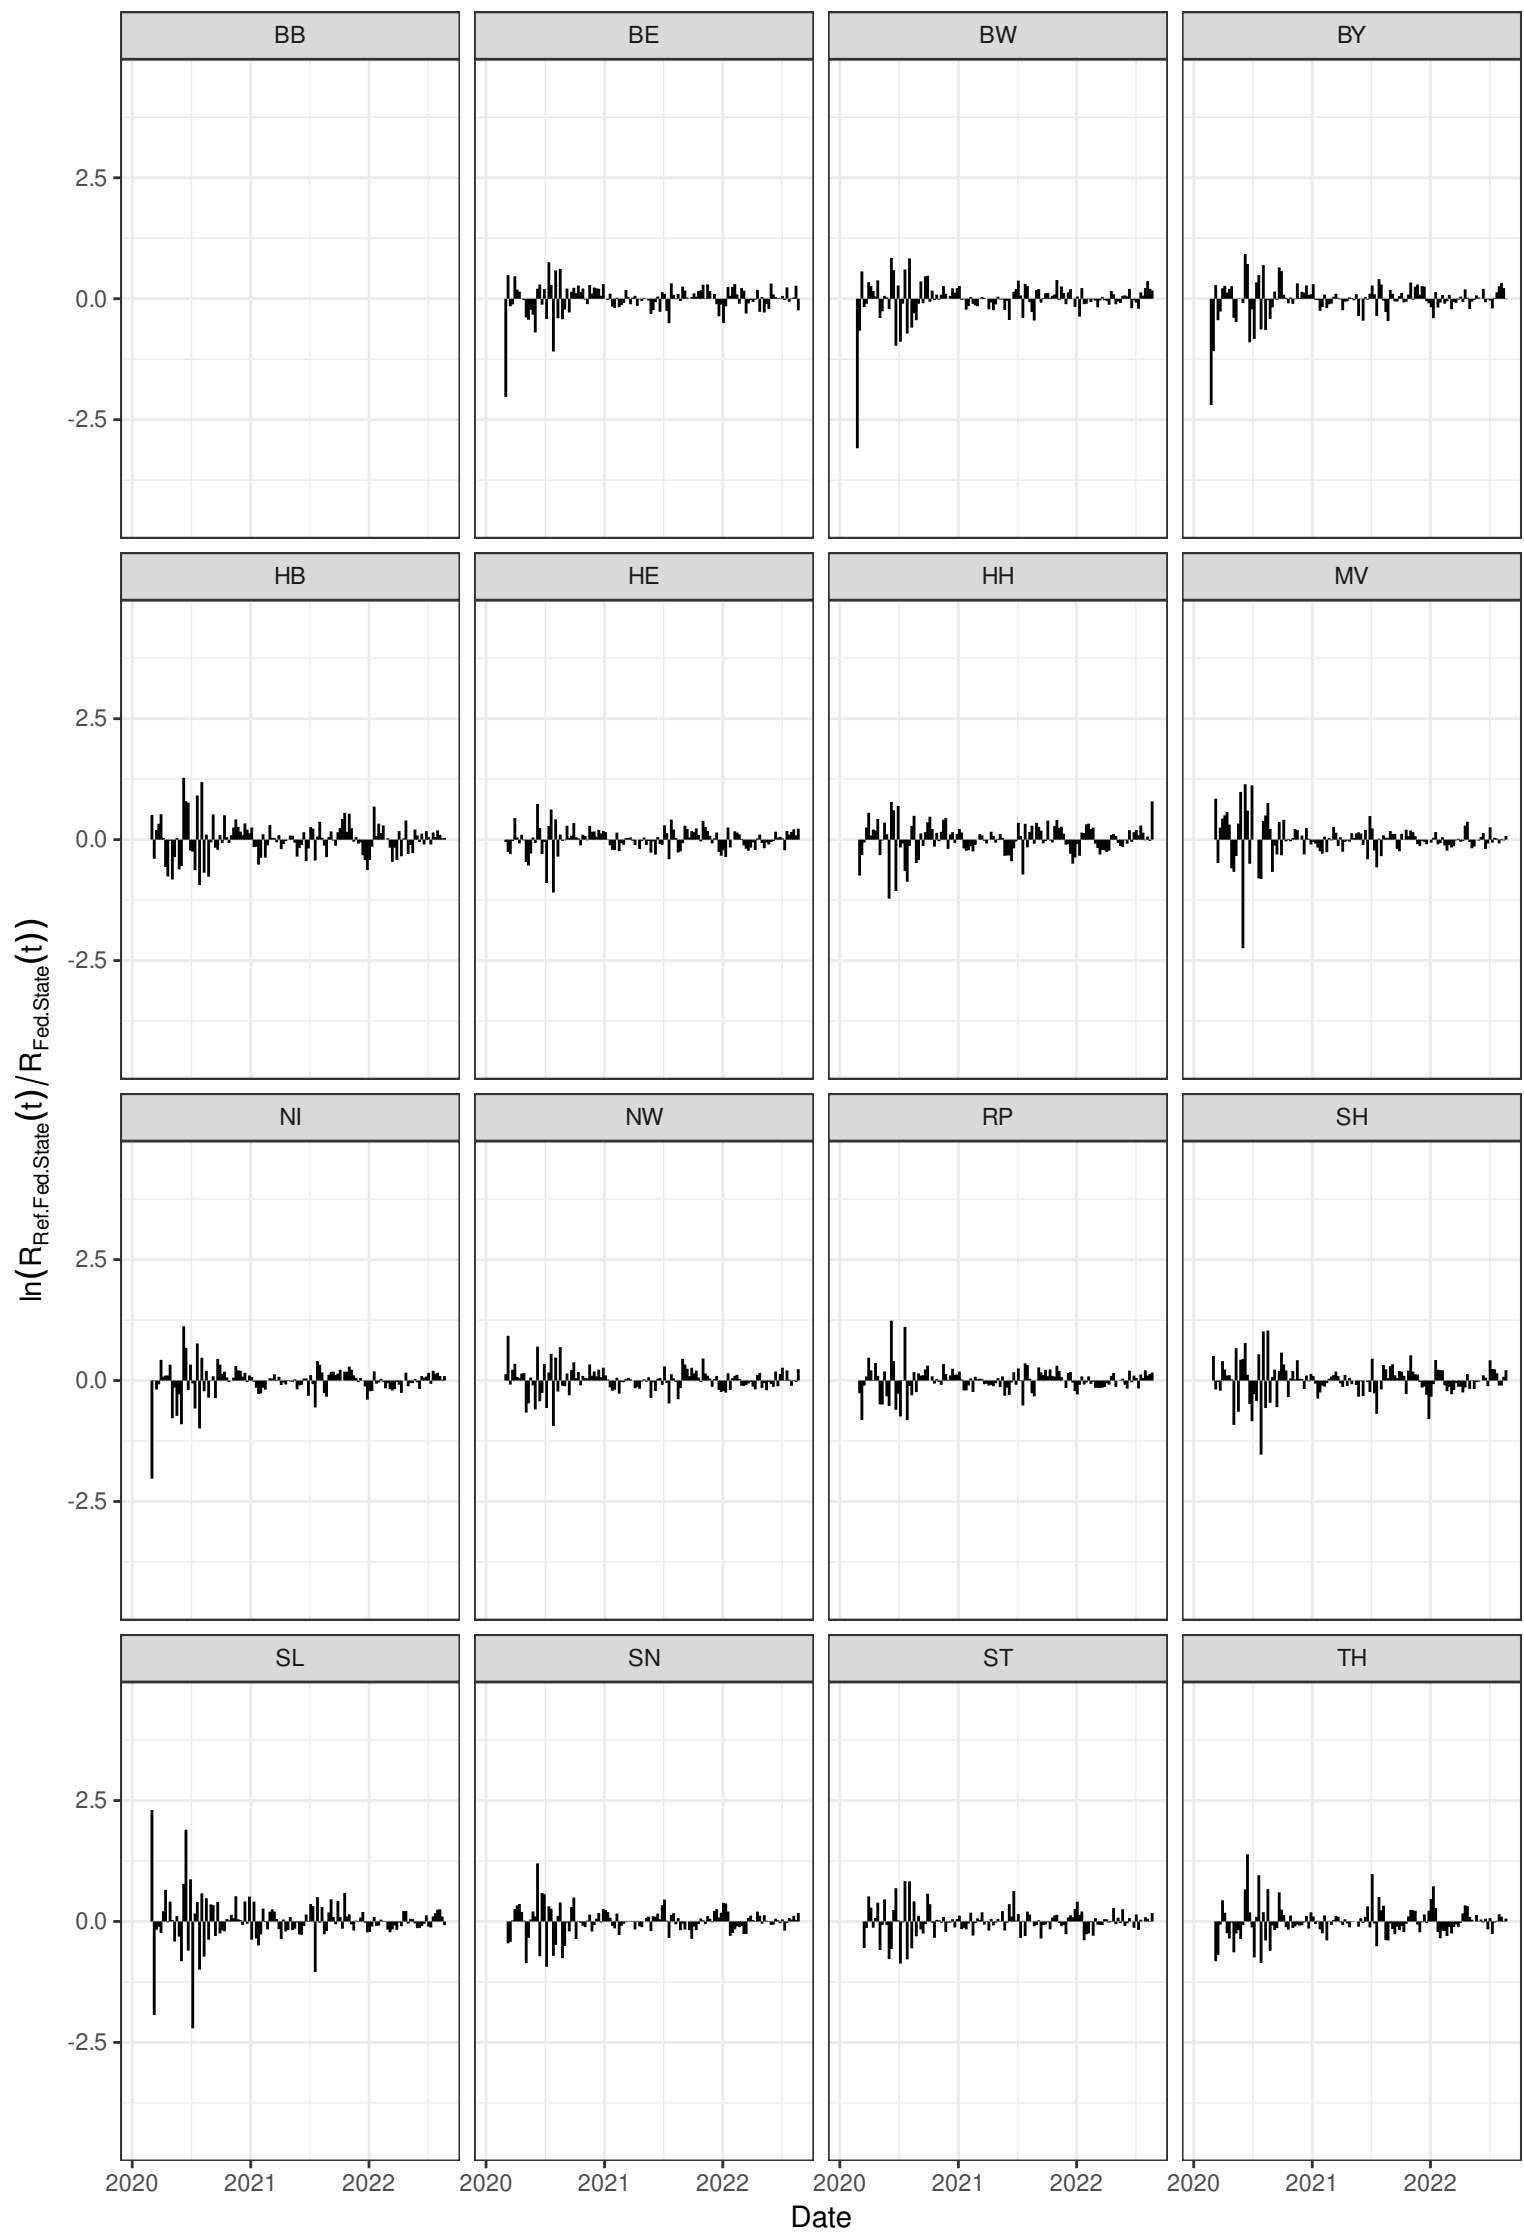

Reference State: BE

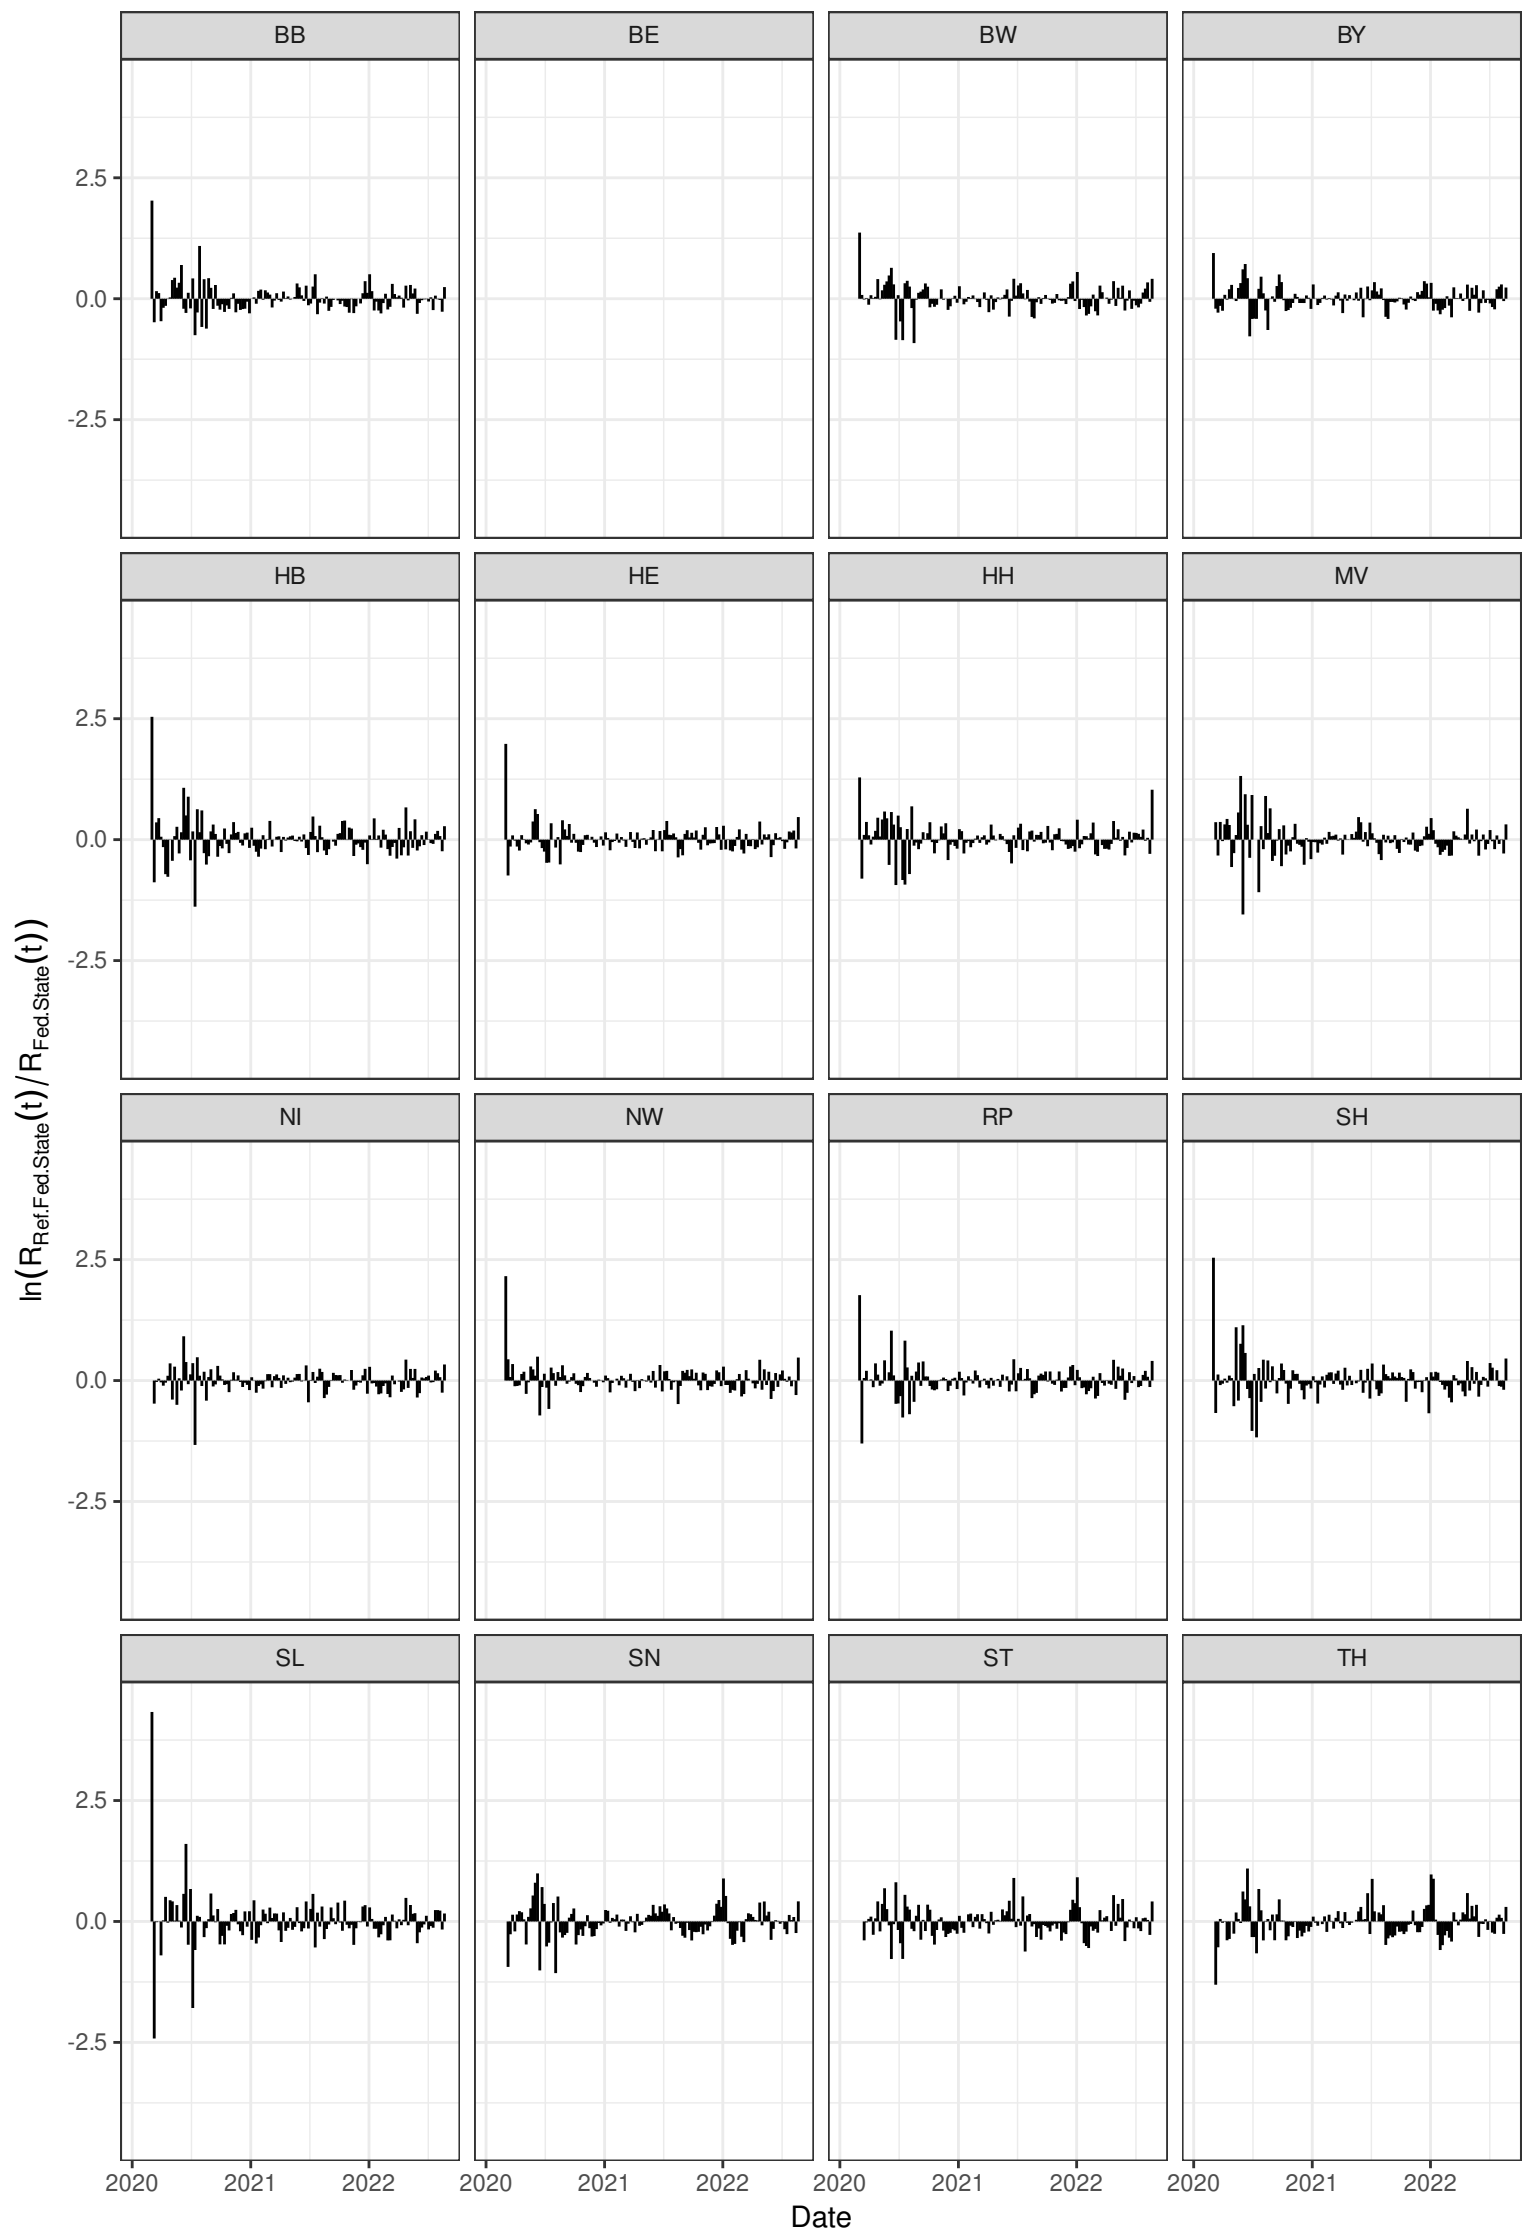

# Reference State: BW

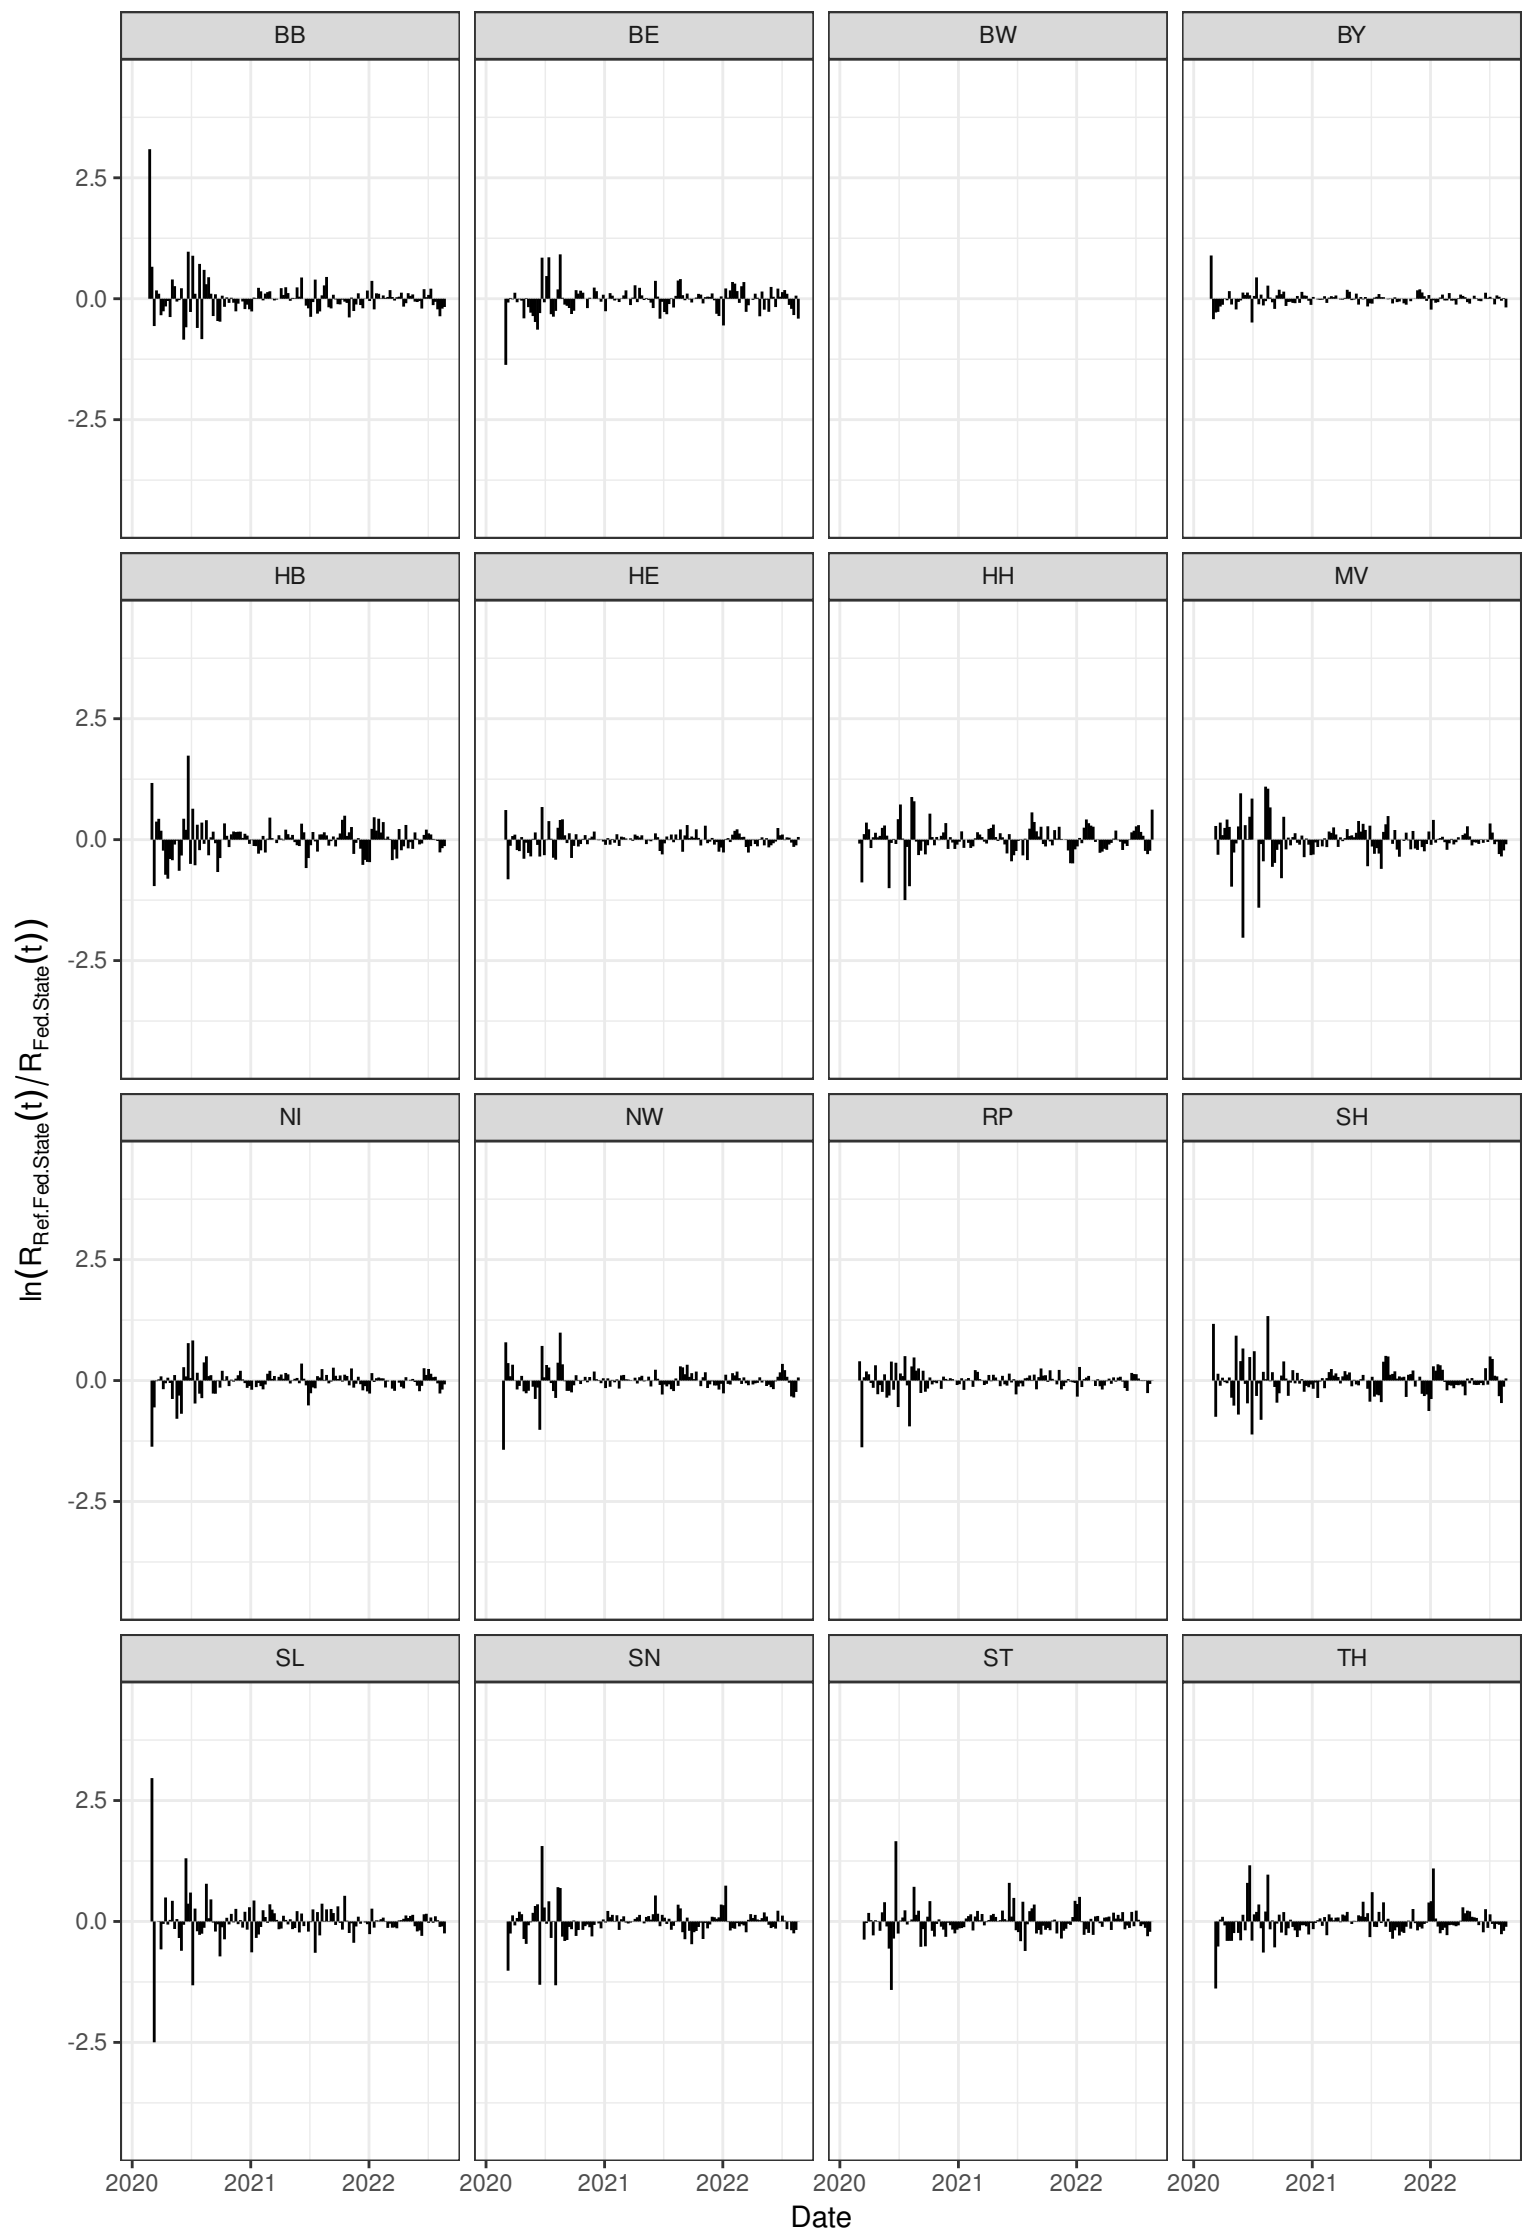

Reference State: BY

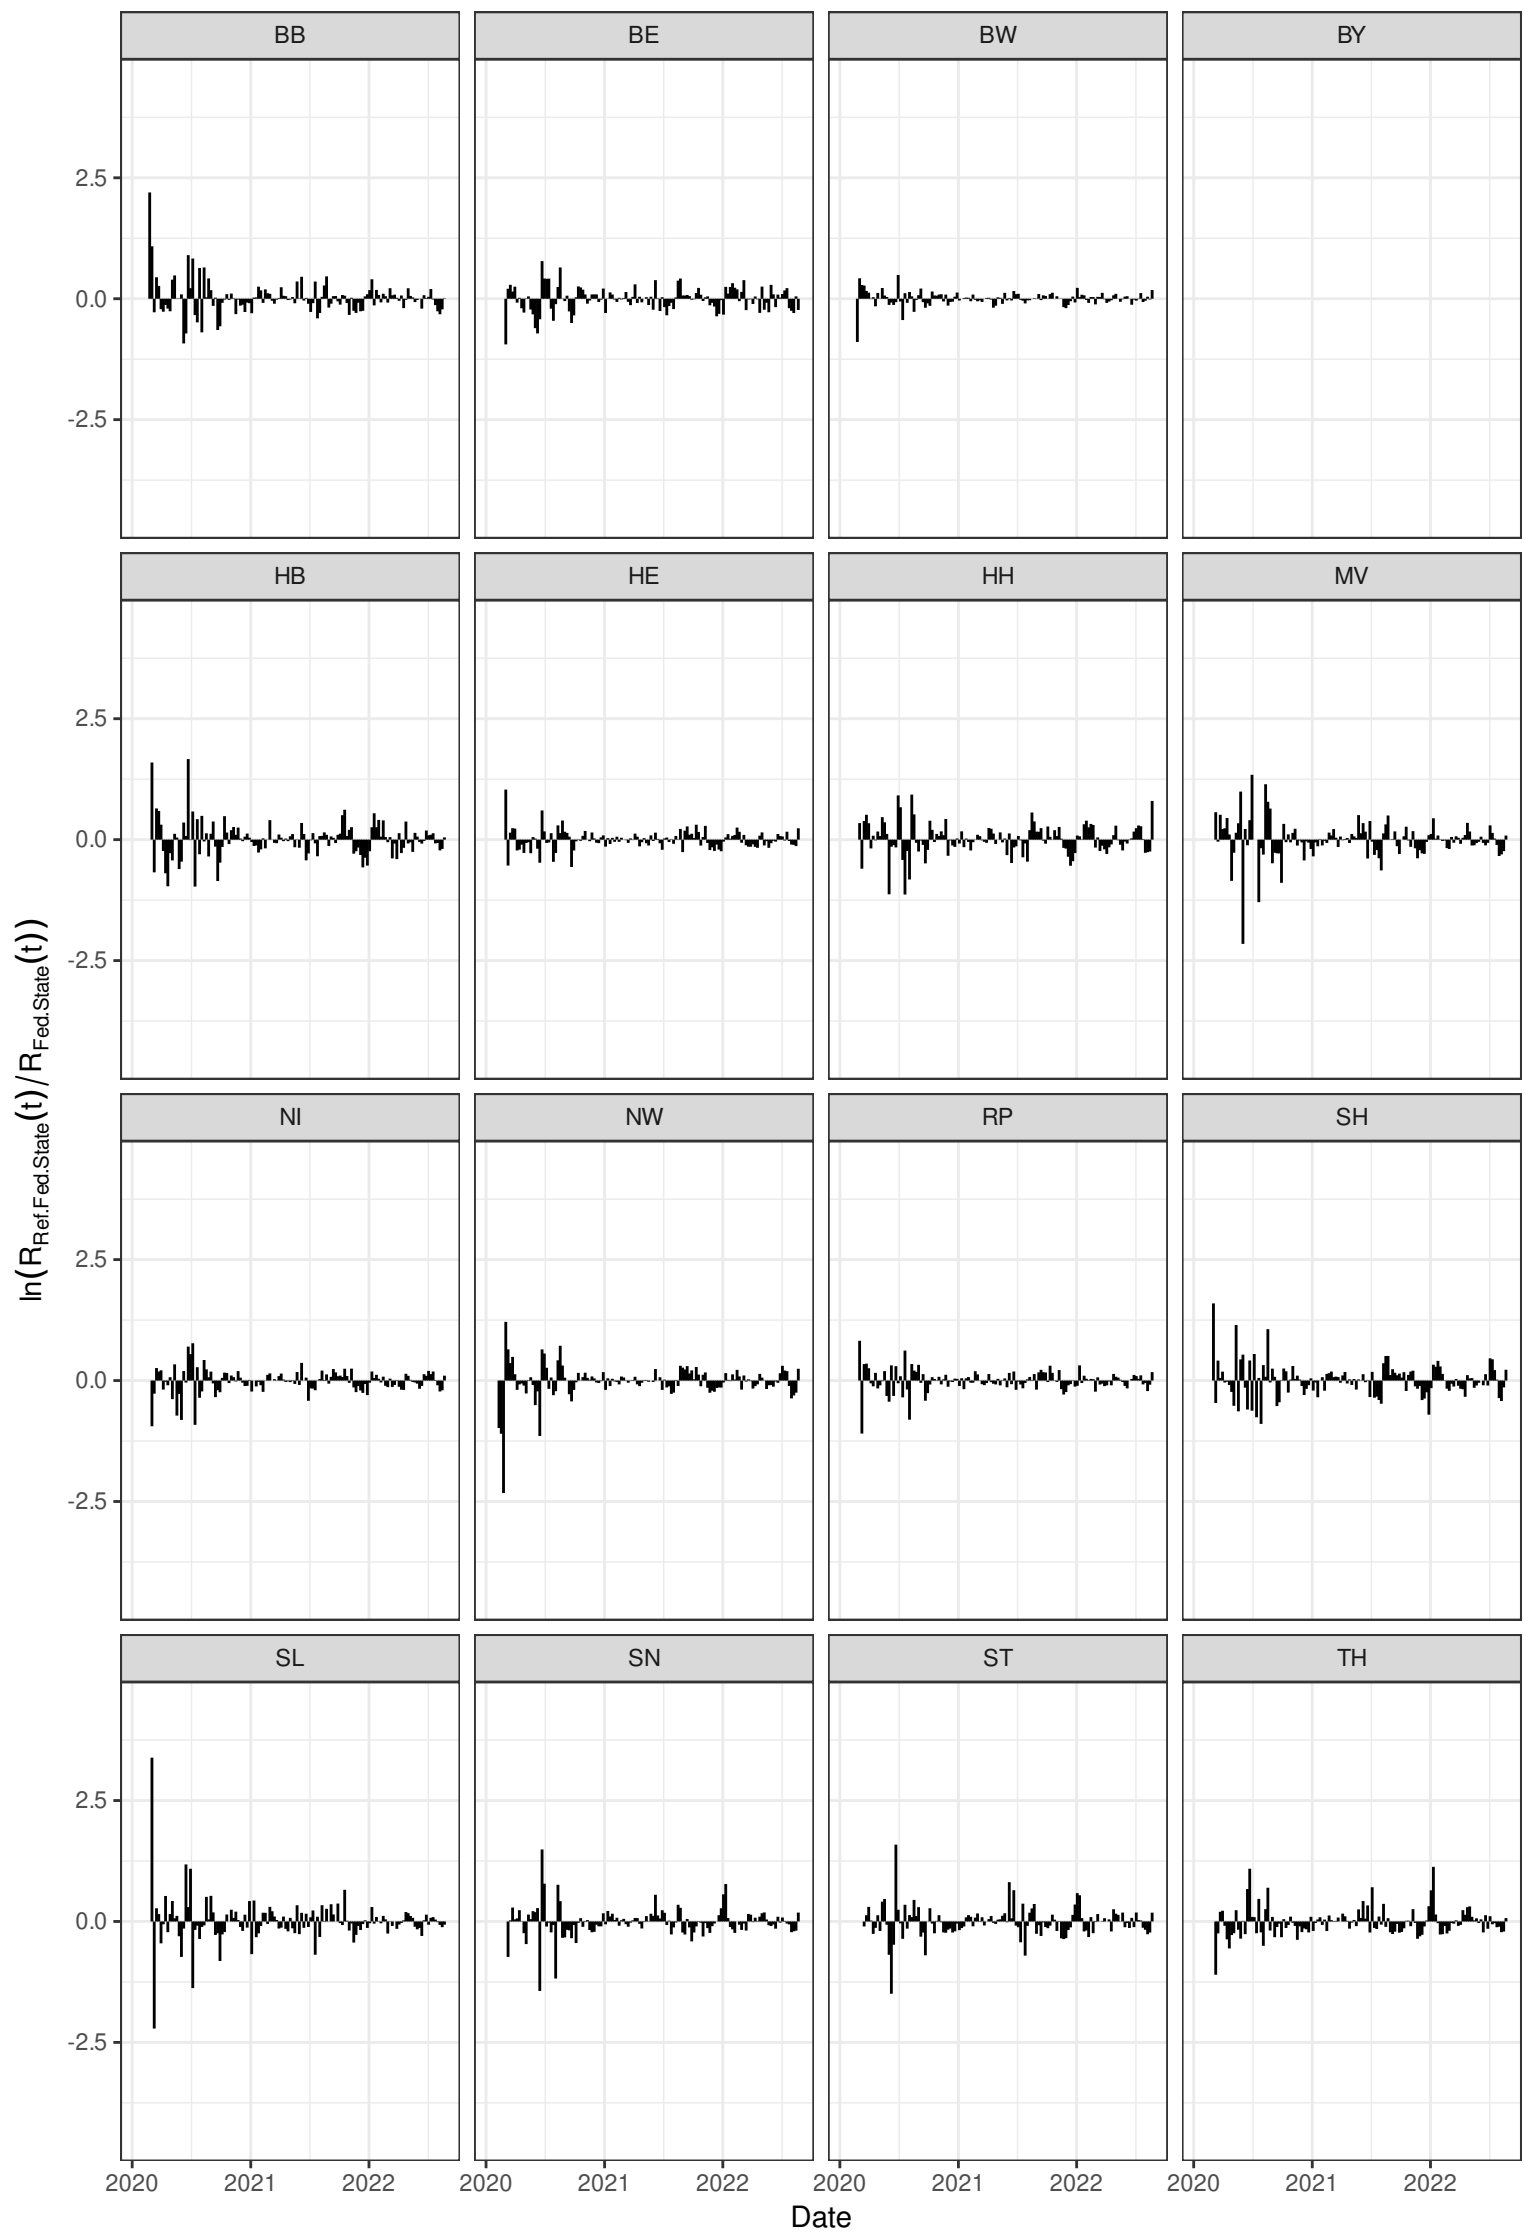

# Reference State: HB

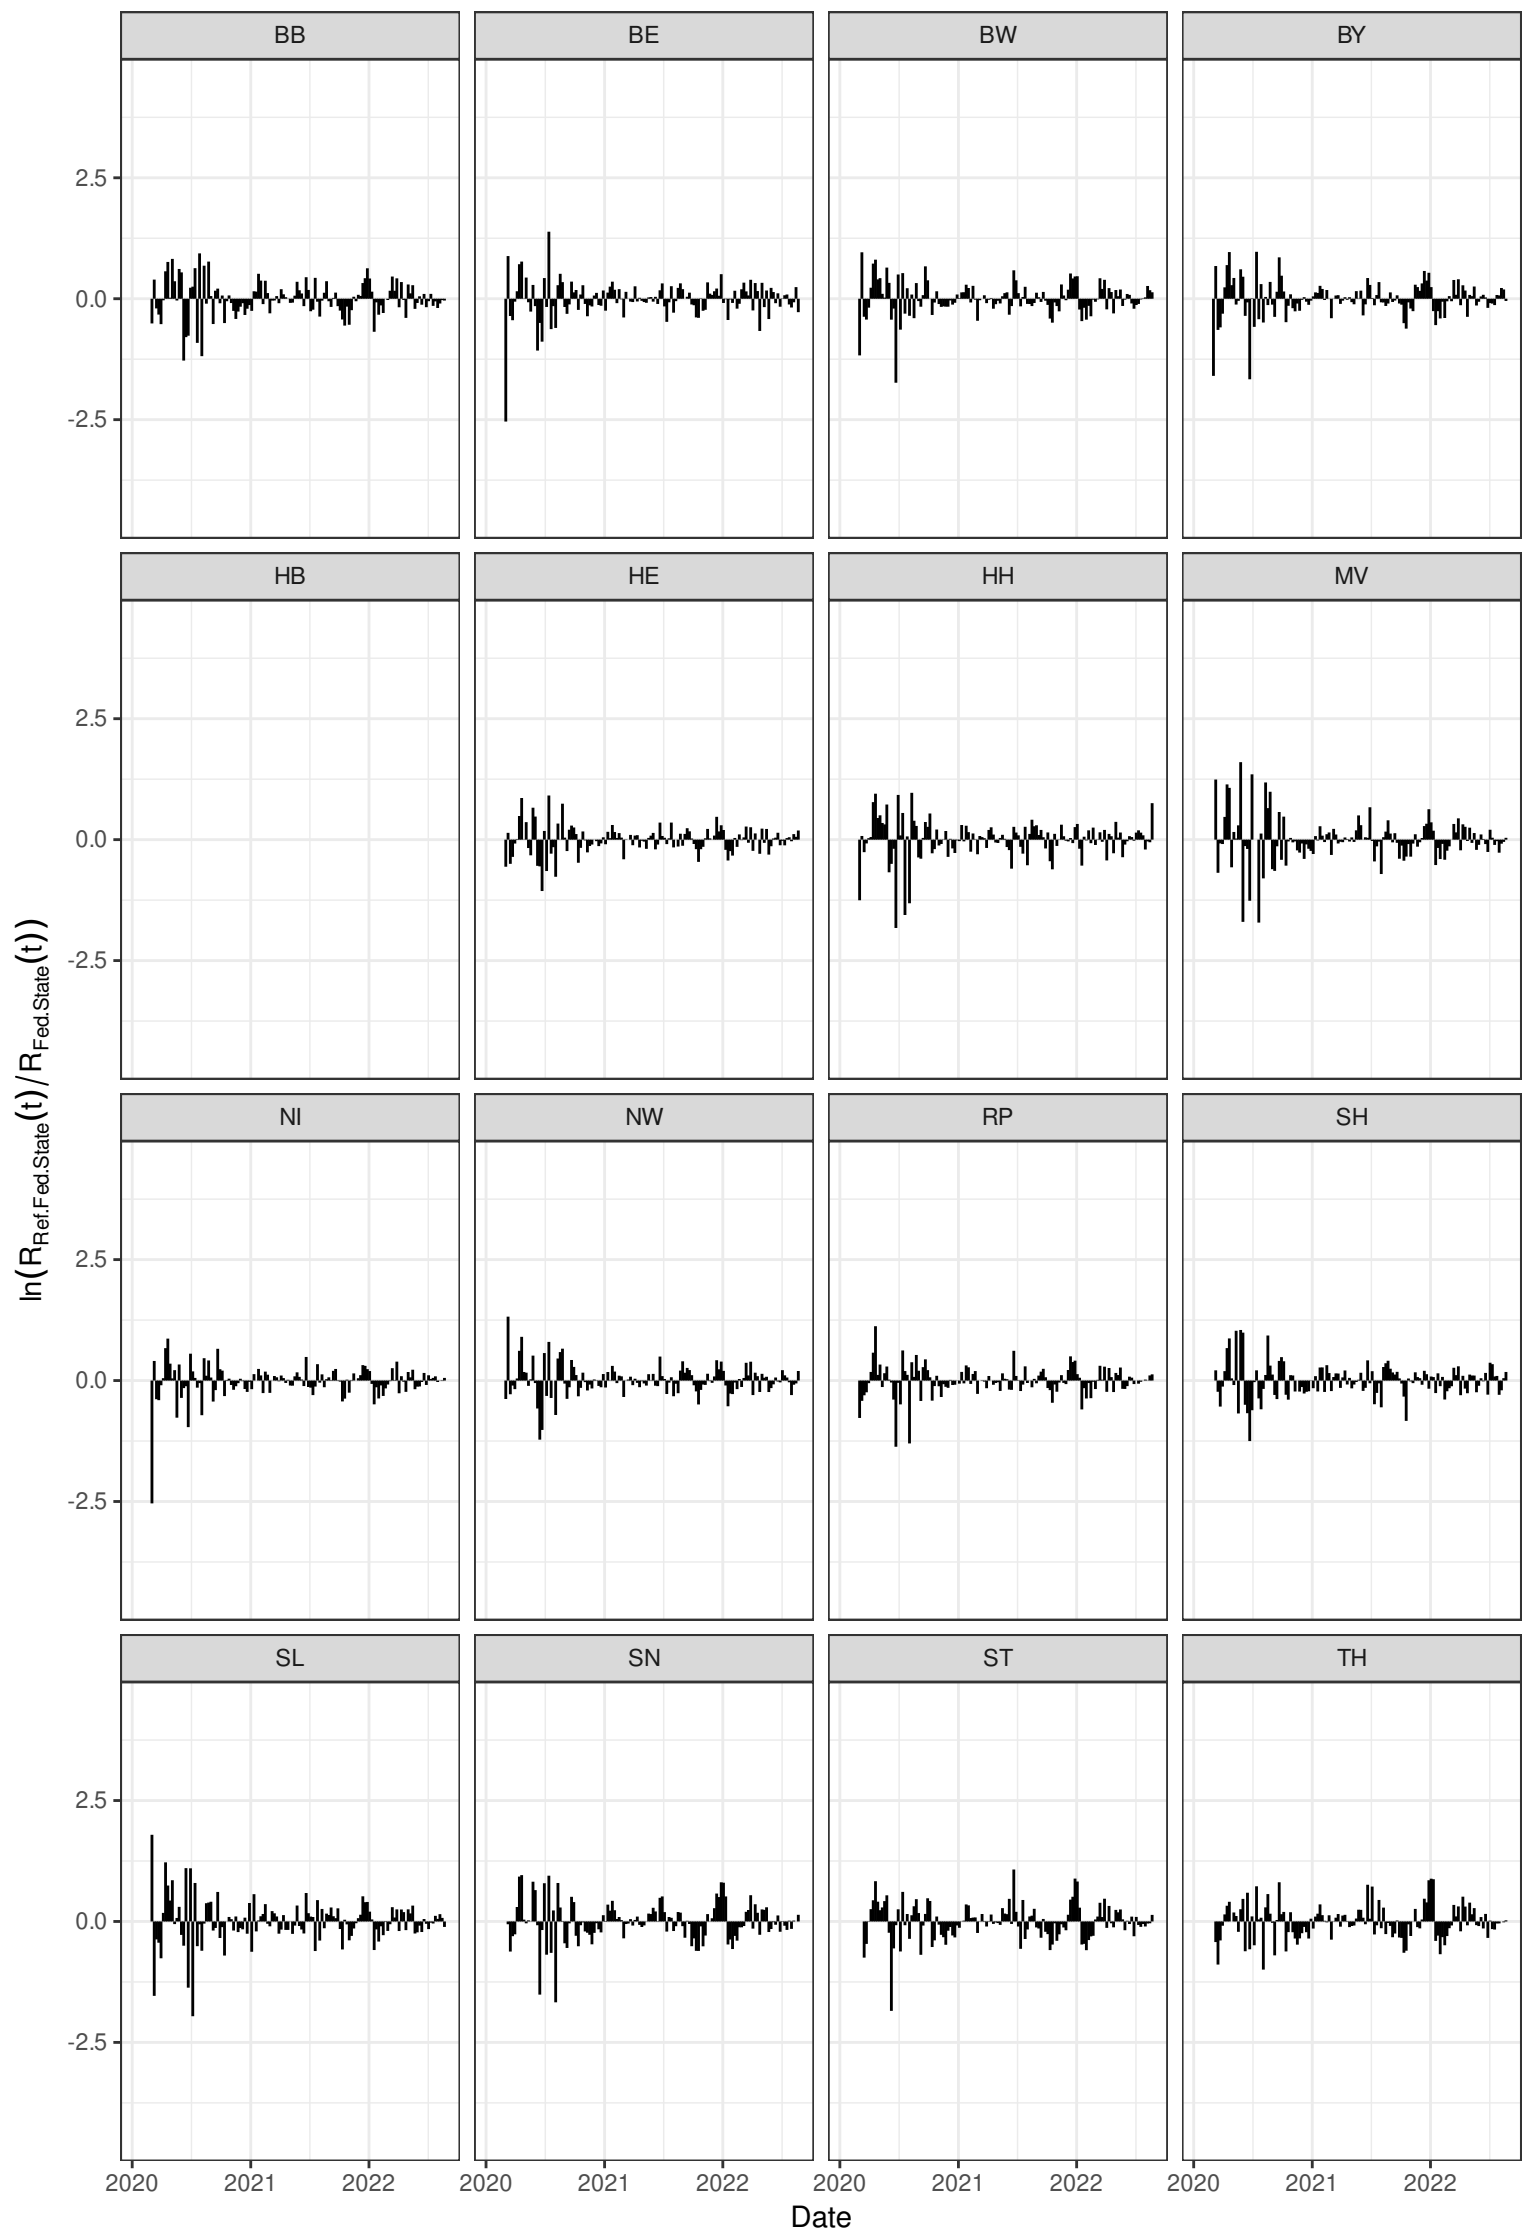

# Reference State: HE

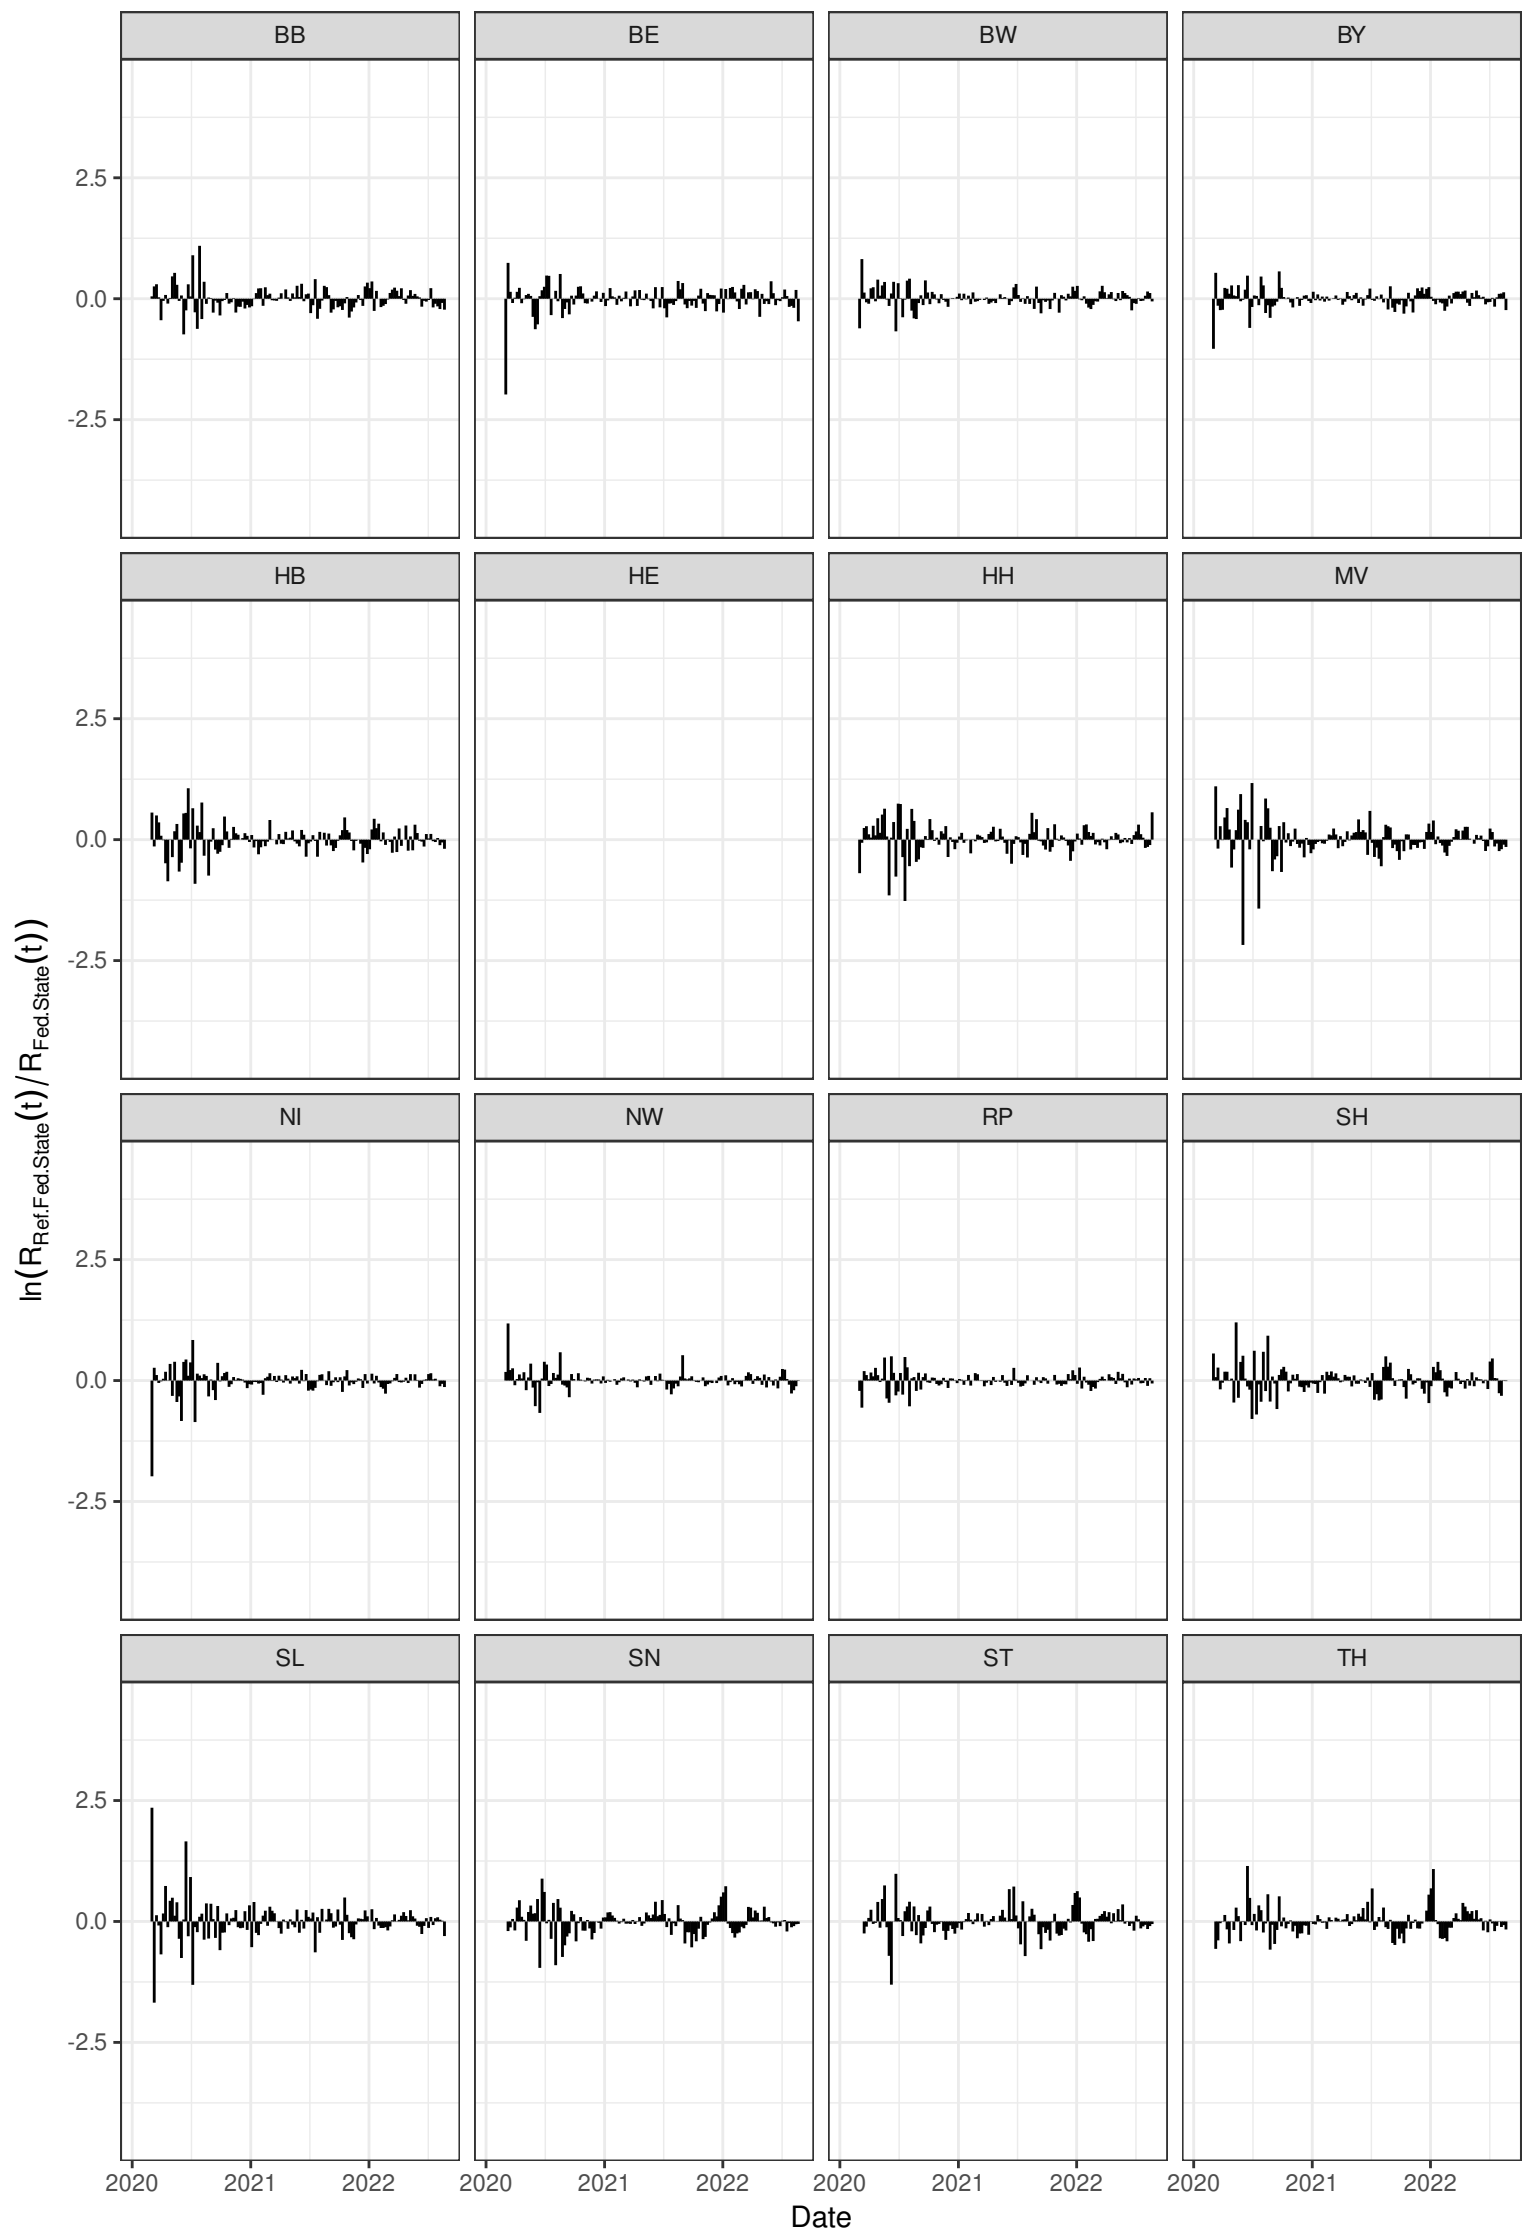

Reference State: HH

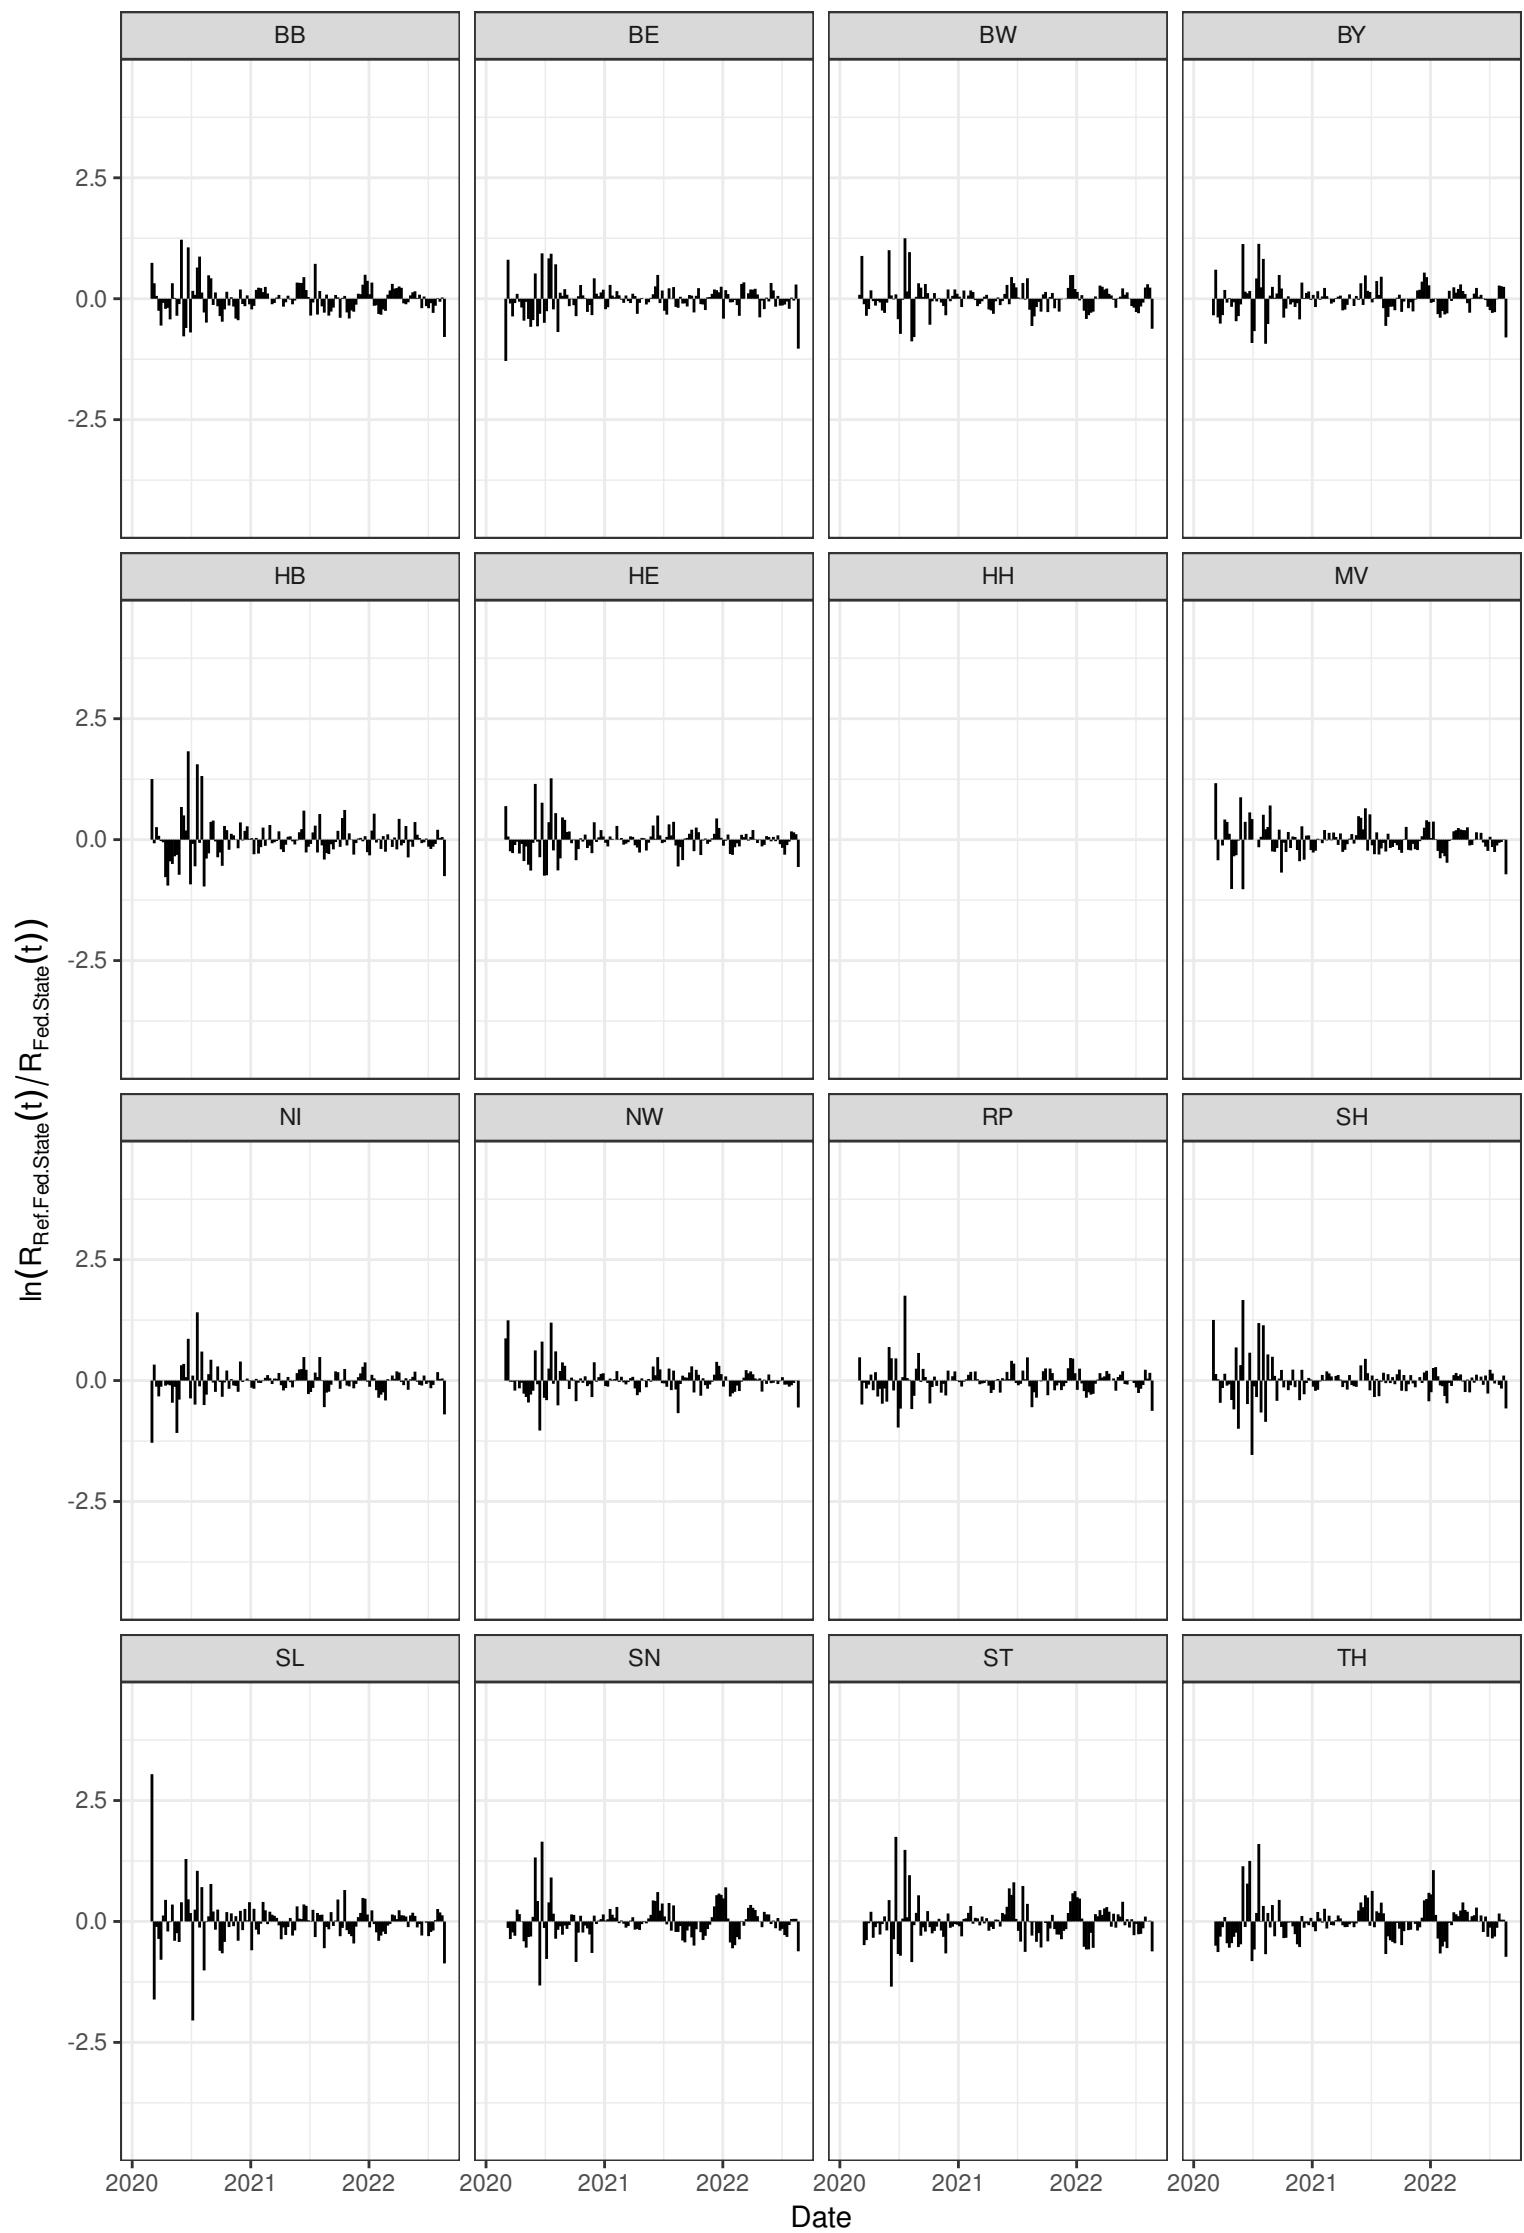

# Reference State: MV

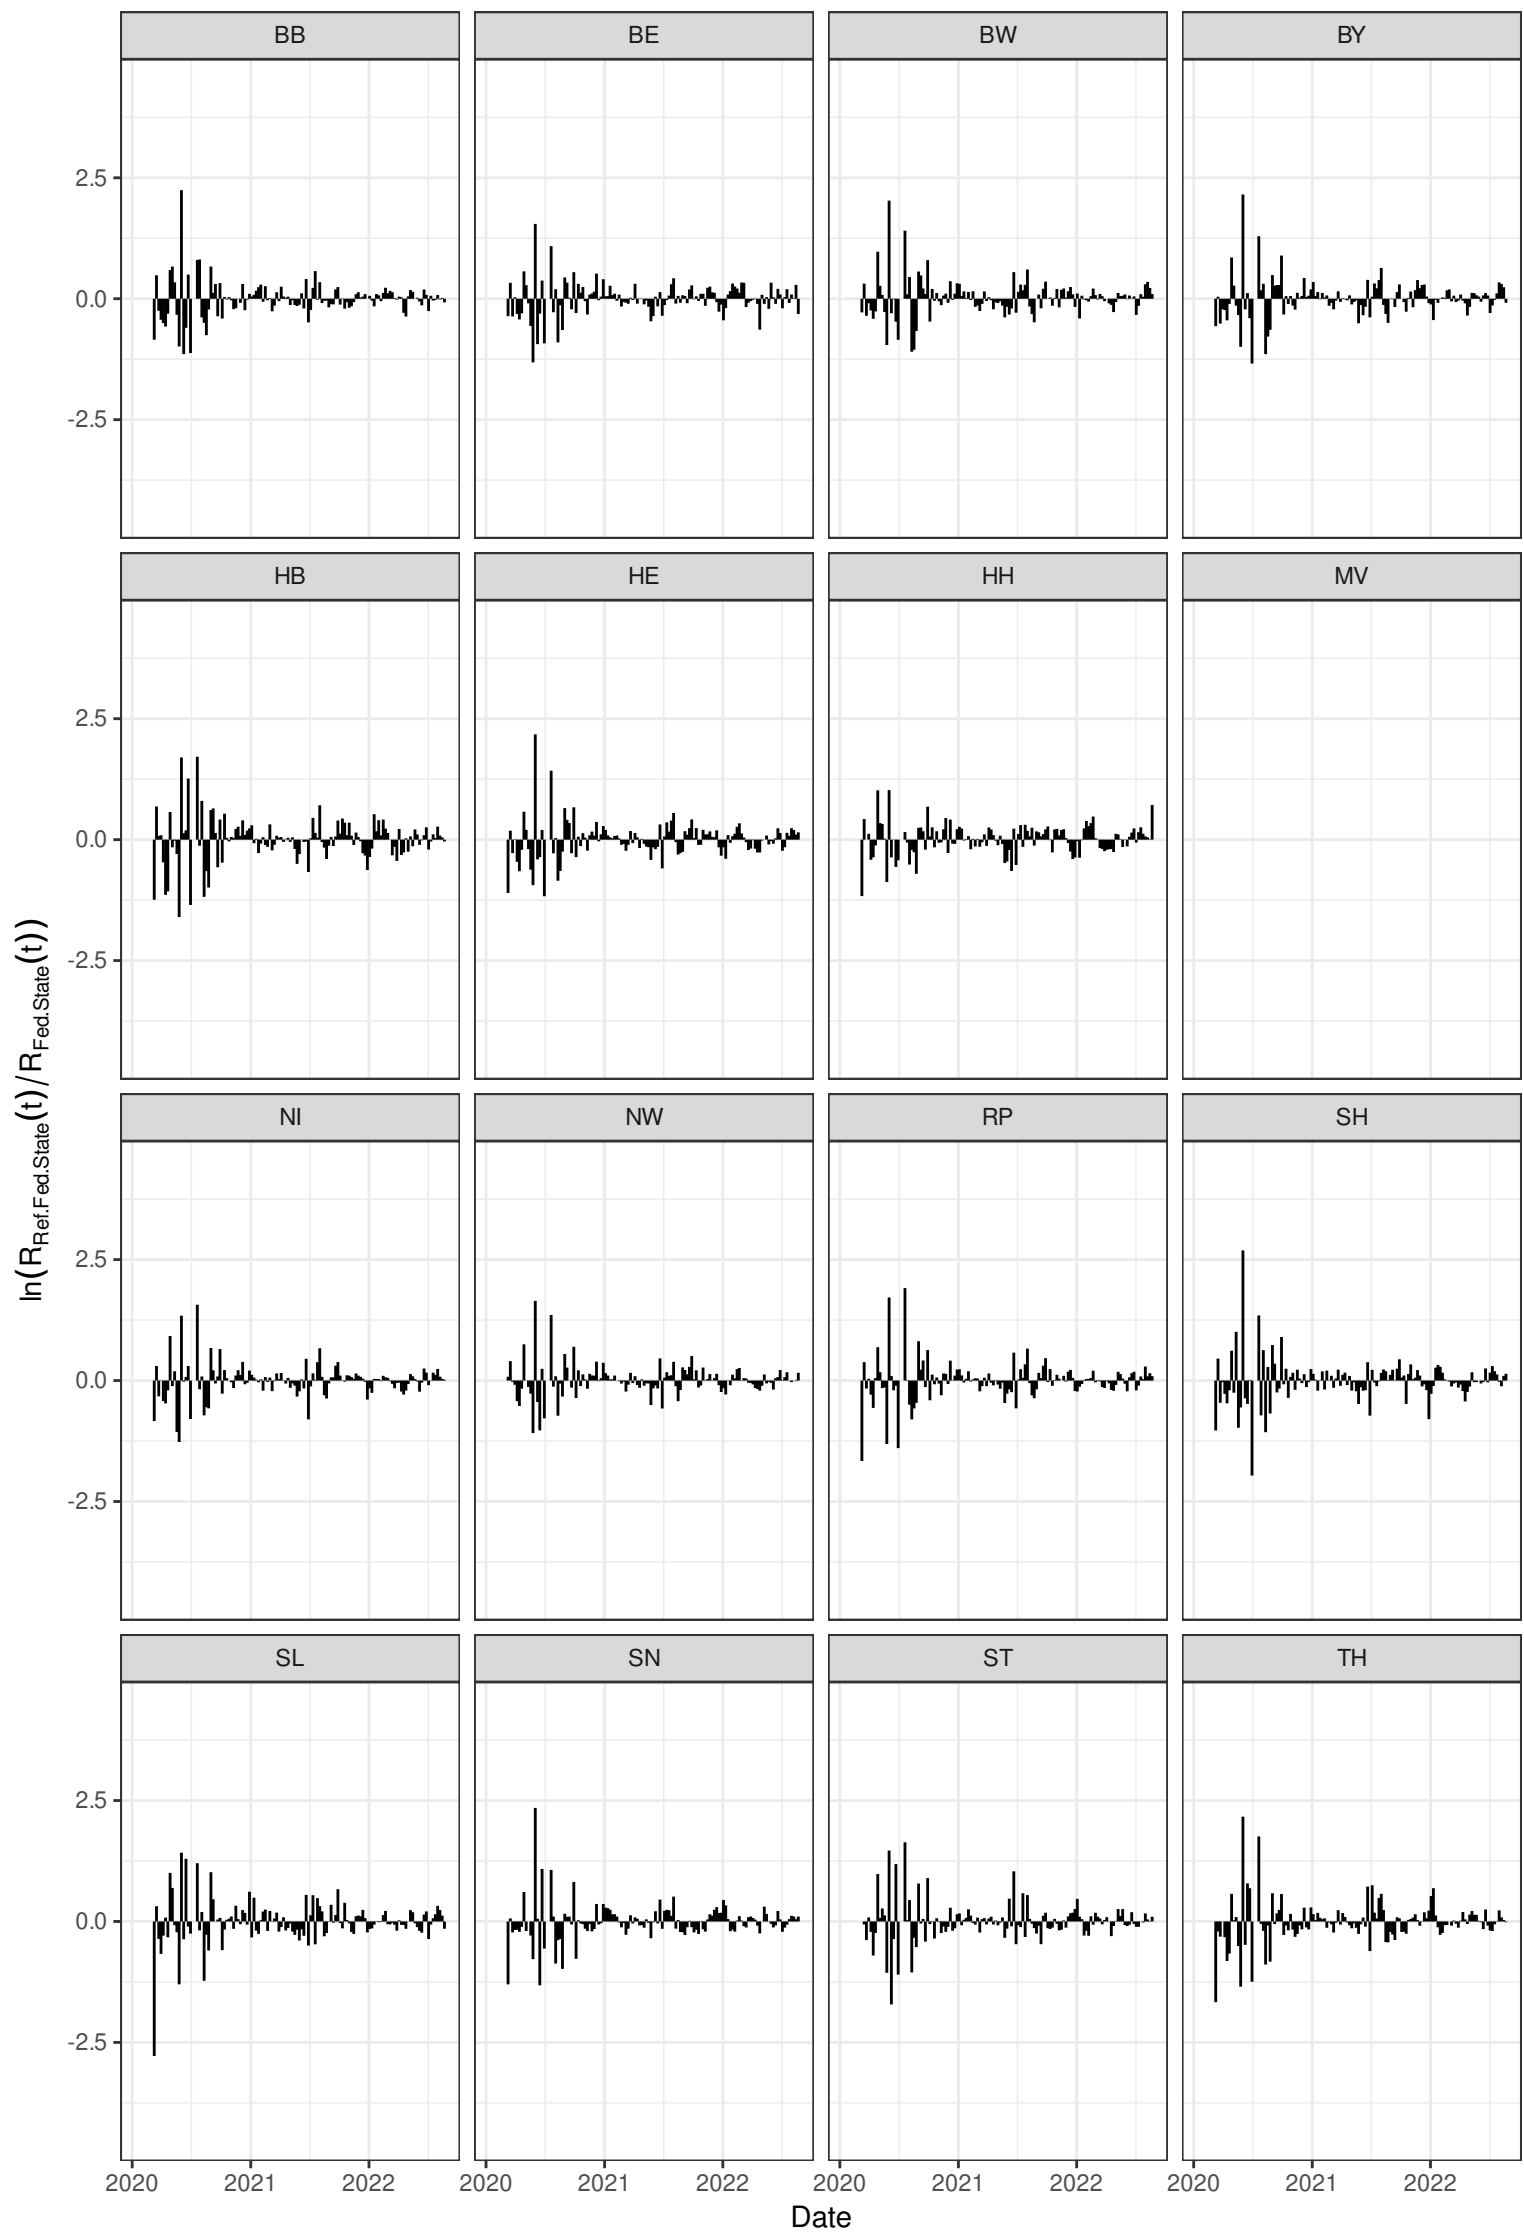

# Reference State: NI

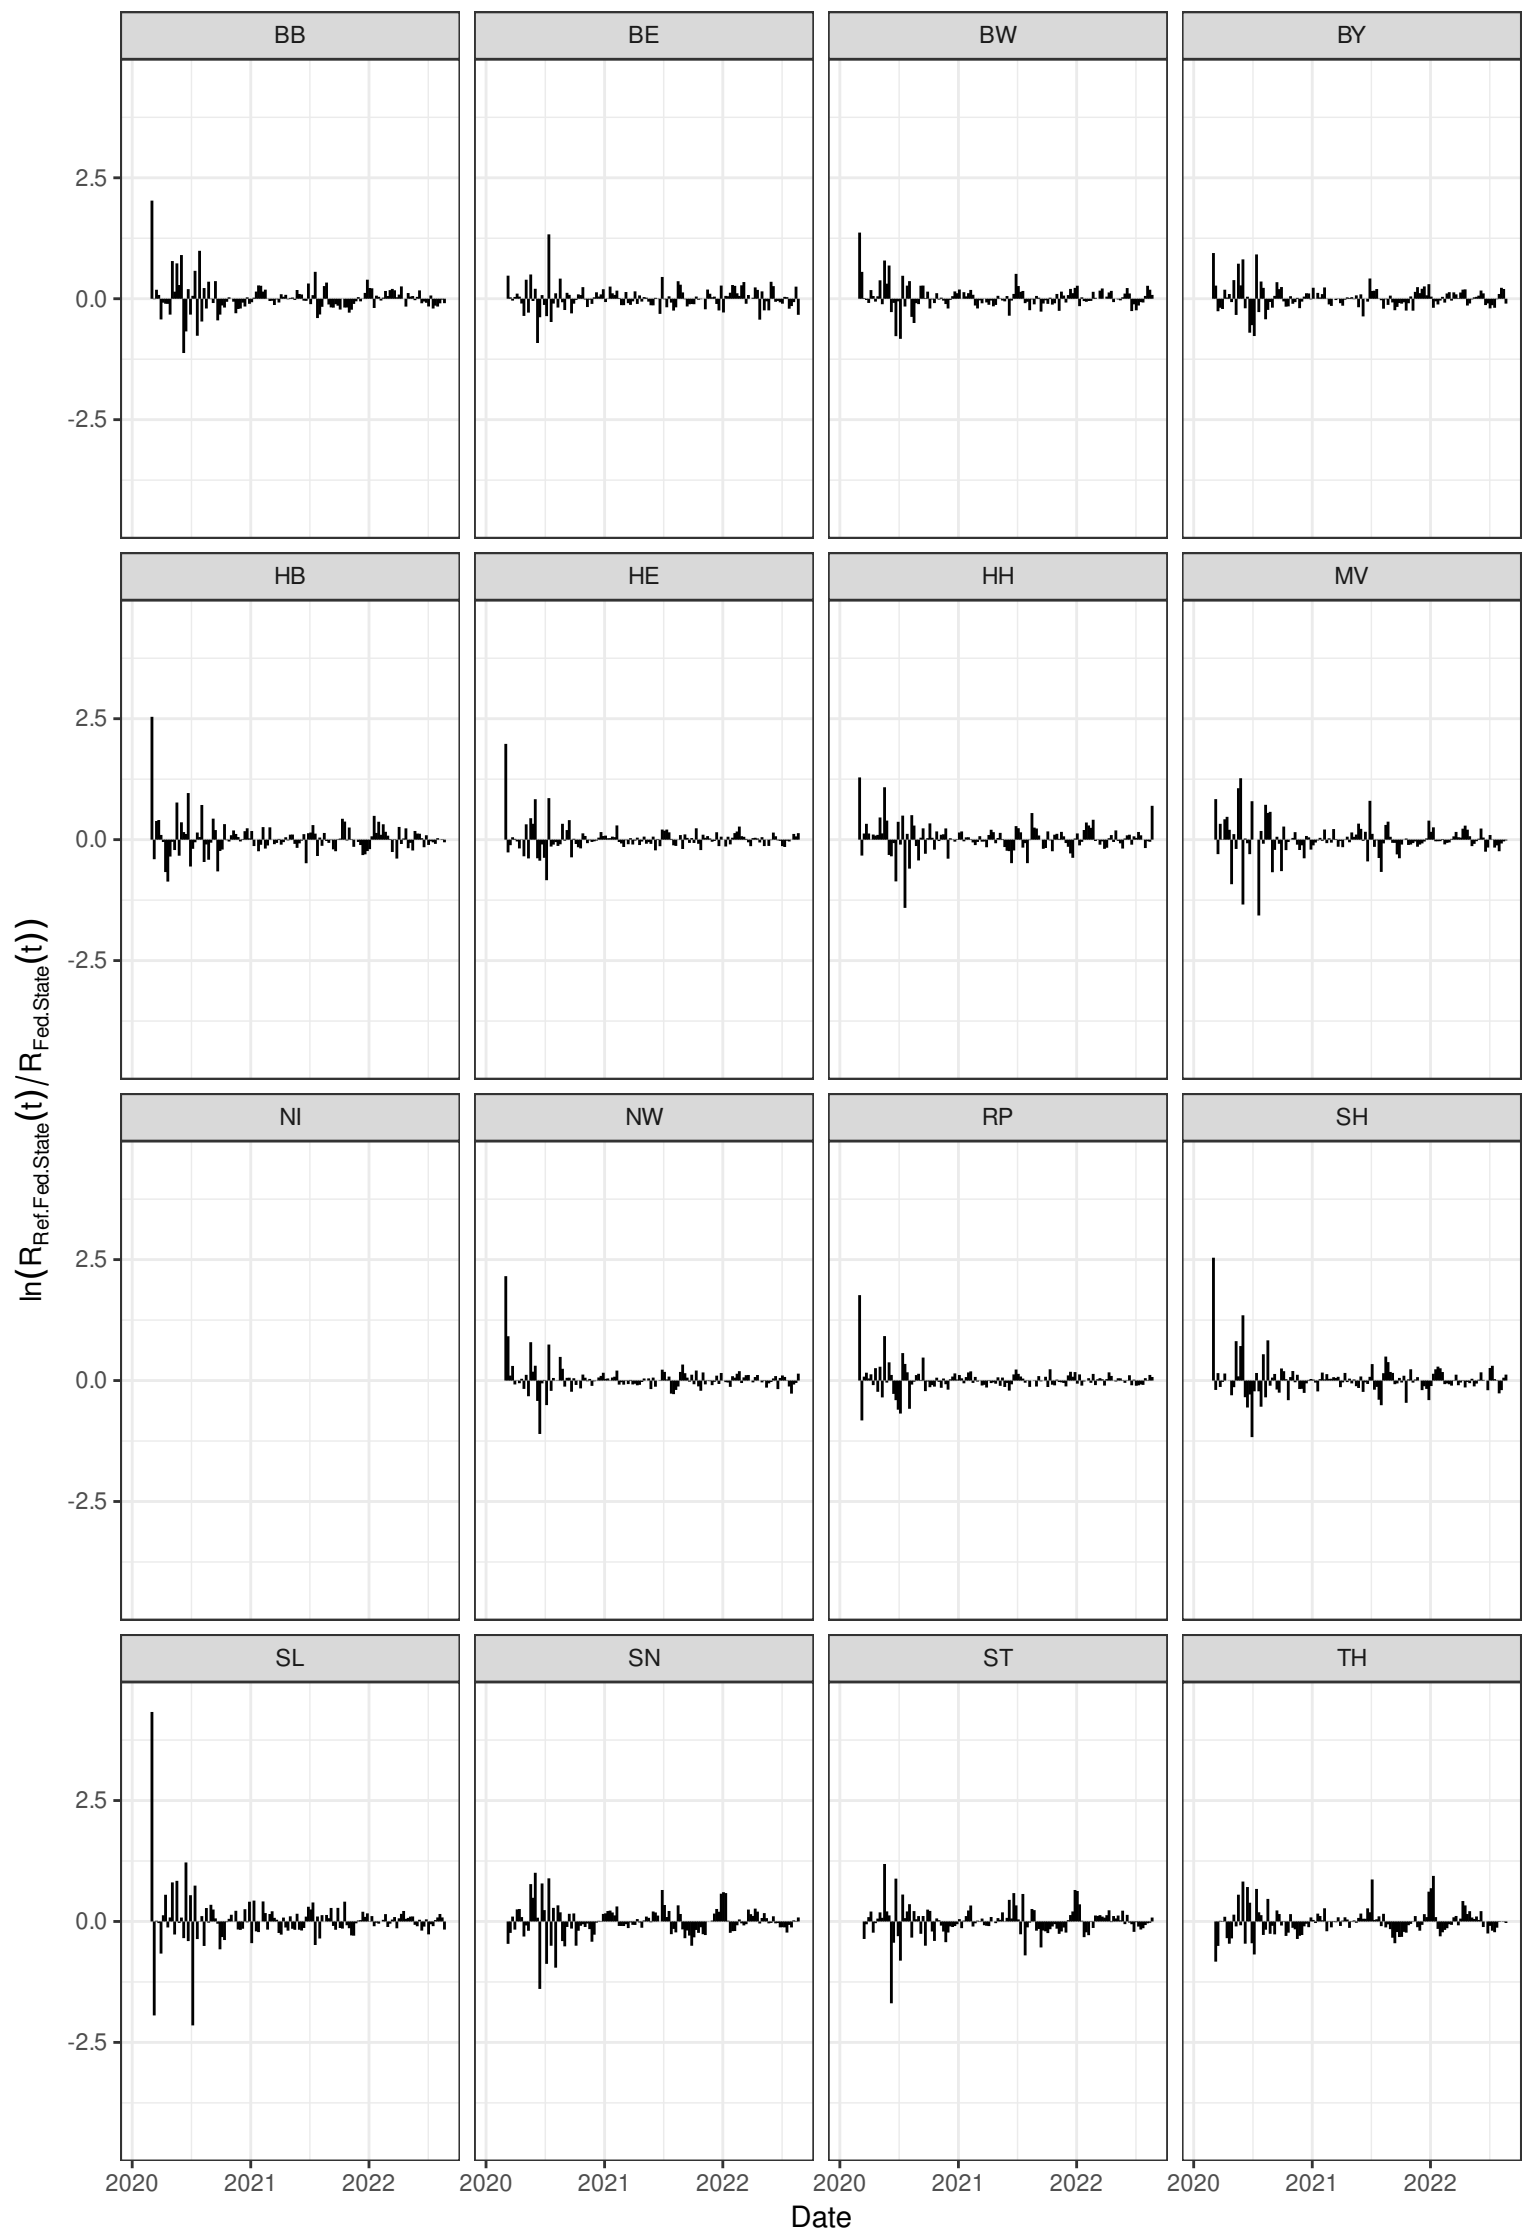

Reference State: NW

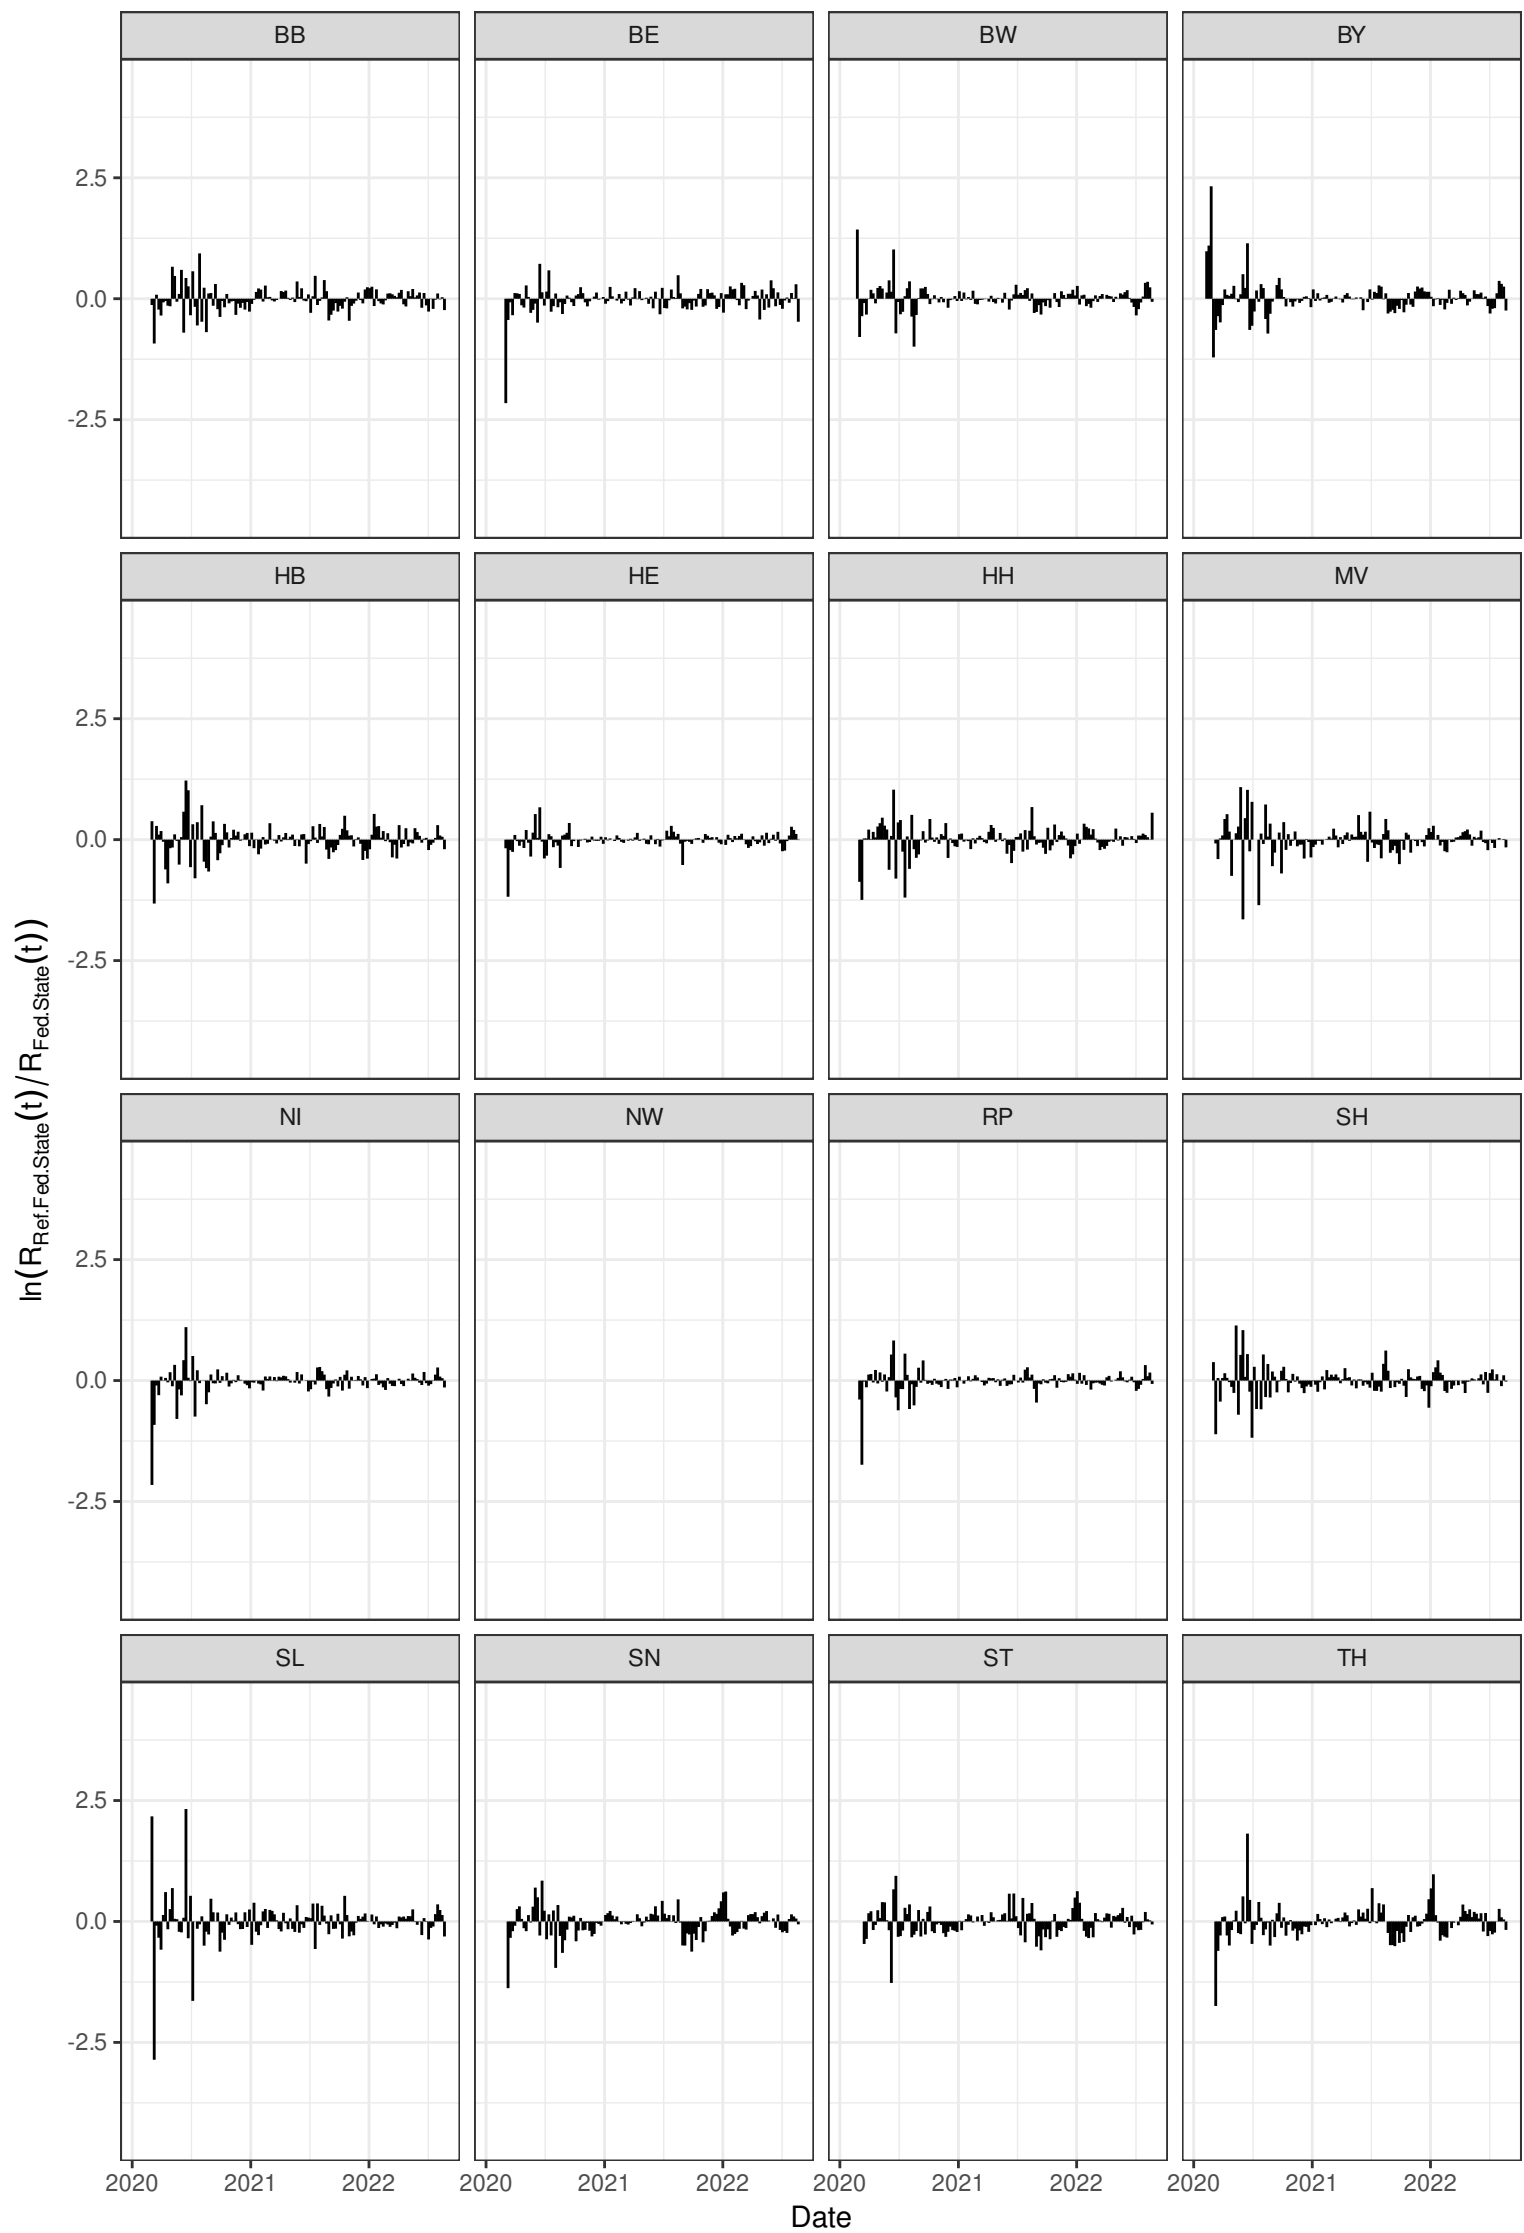

# Reference State: RP

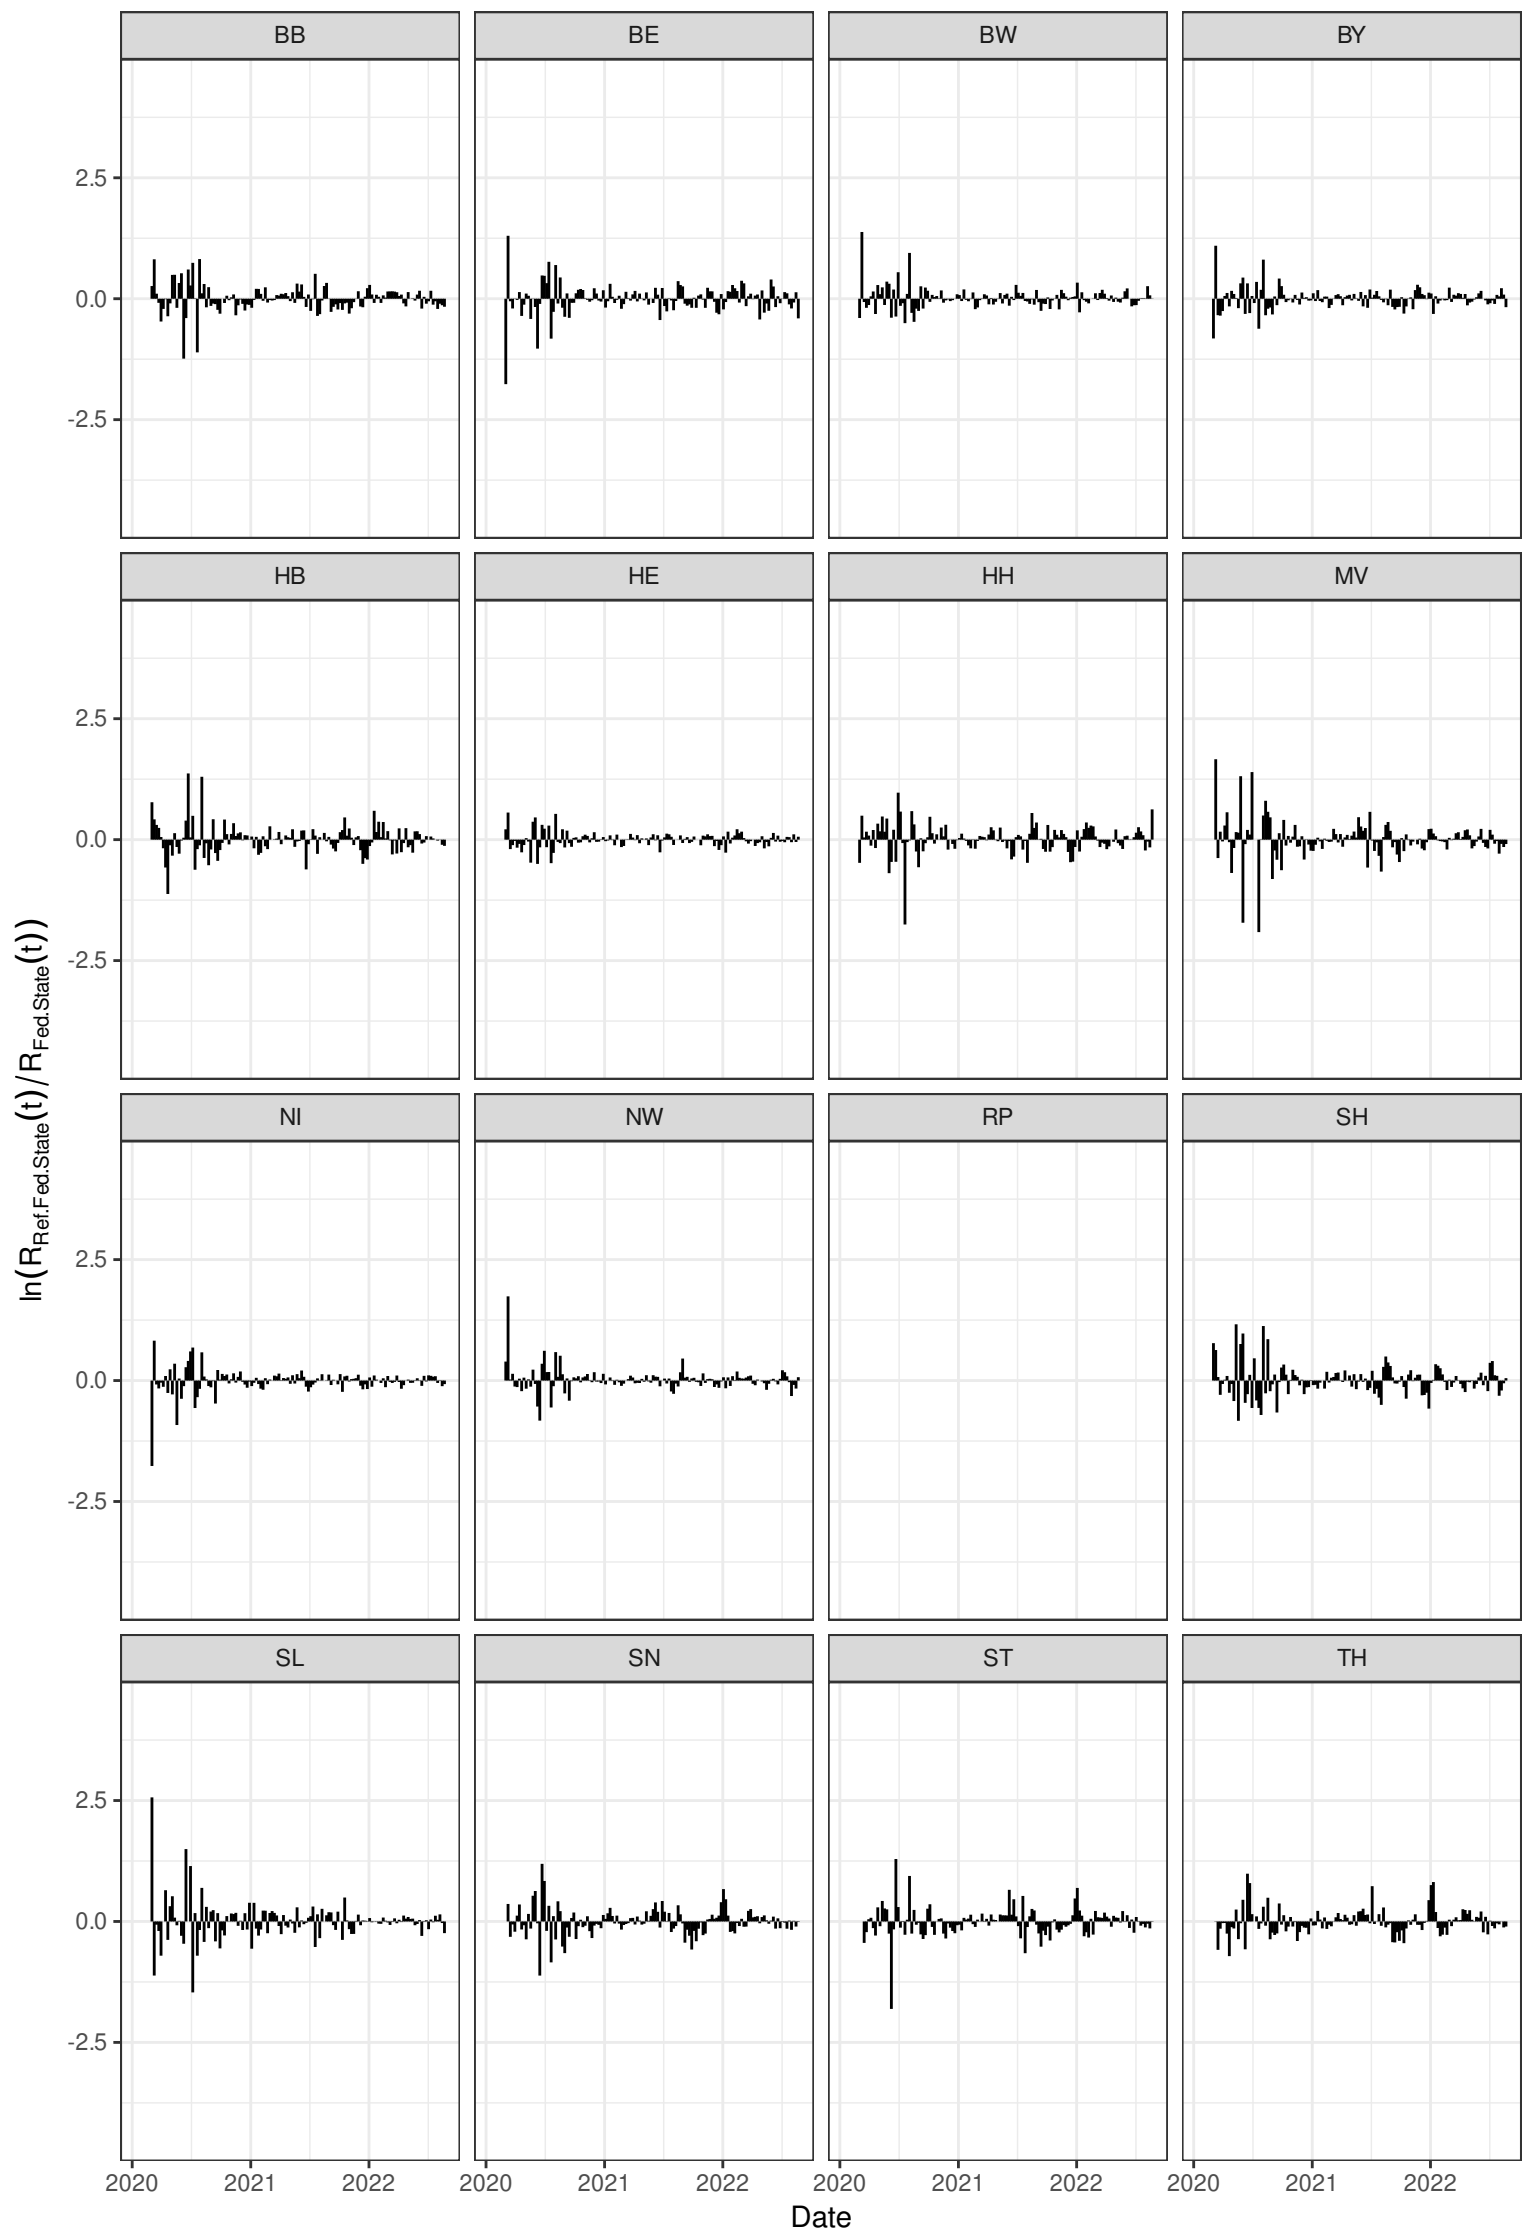

# Reference State: SH

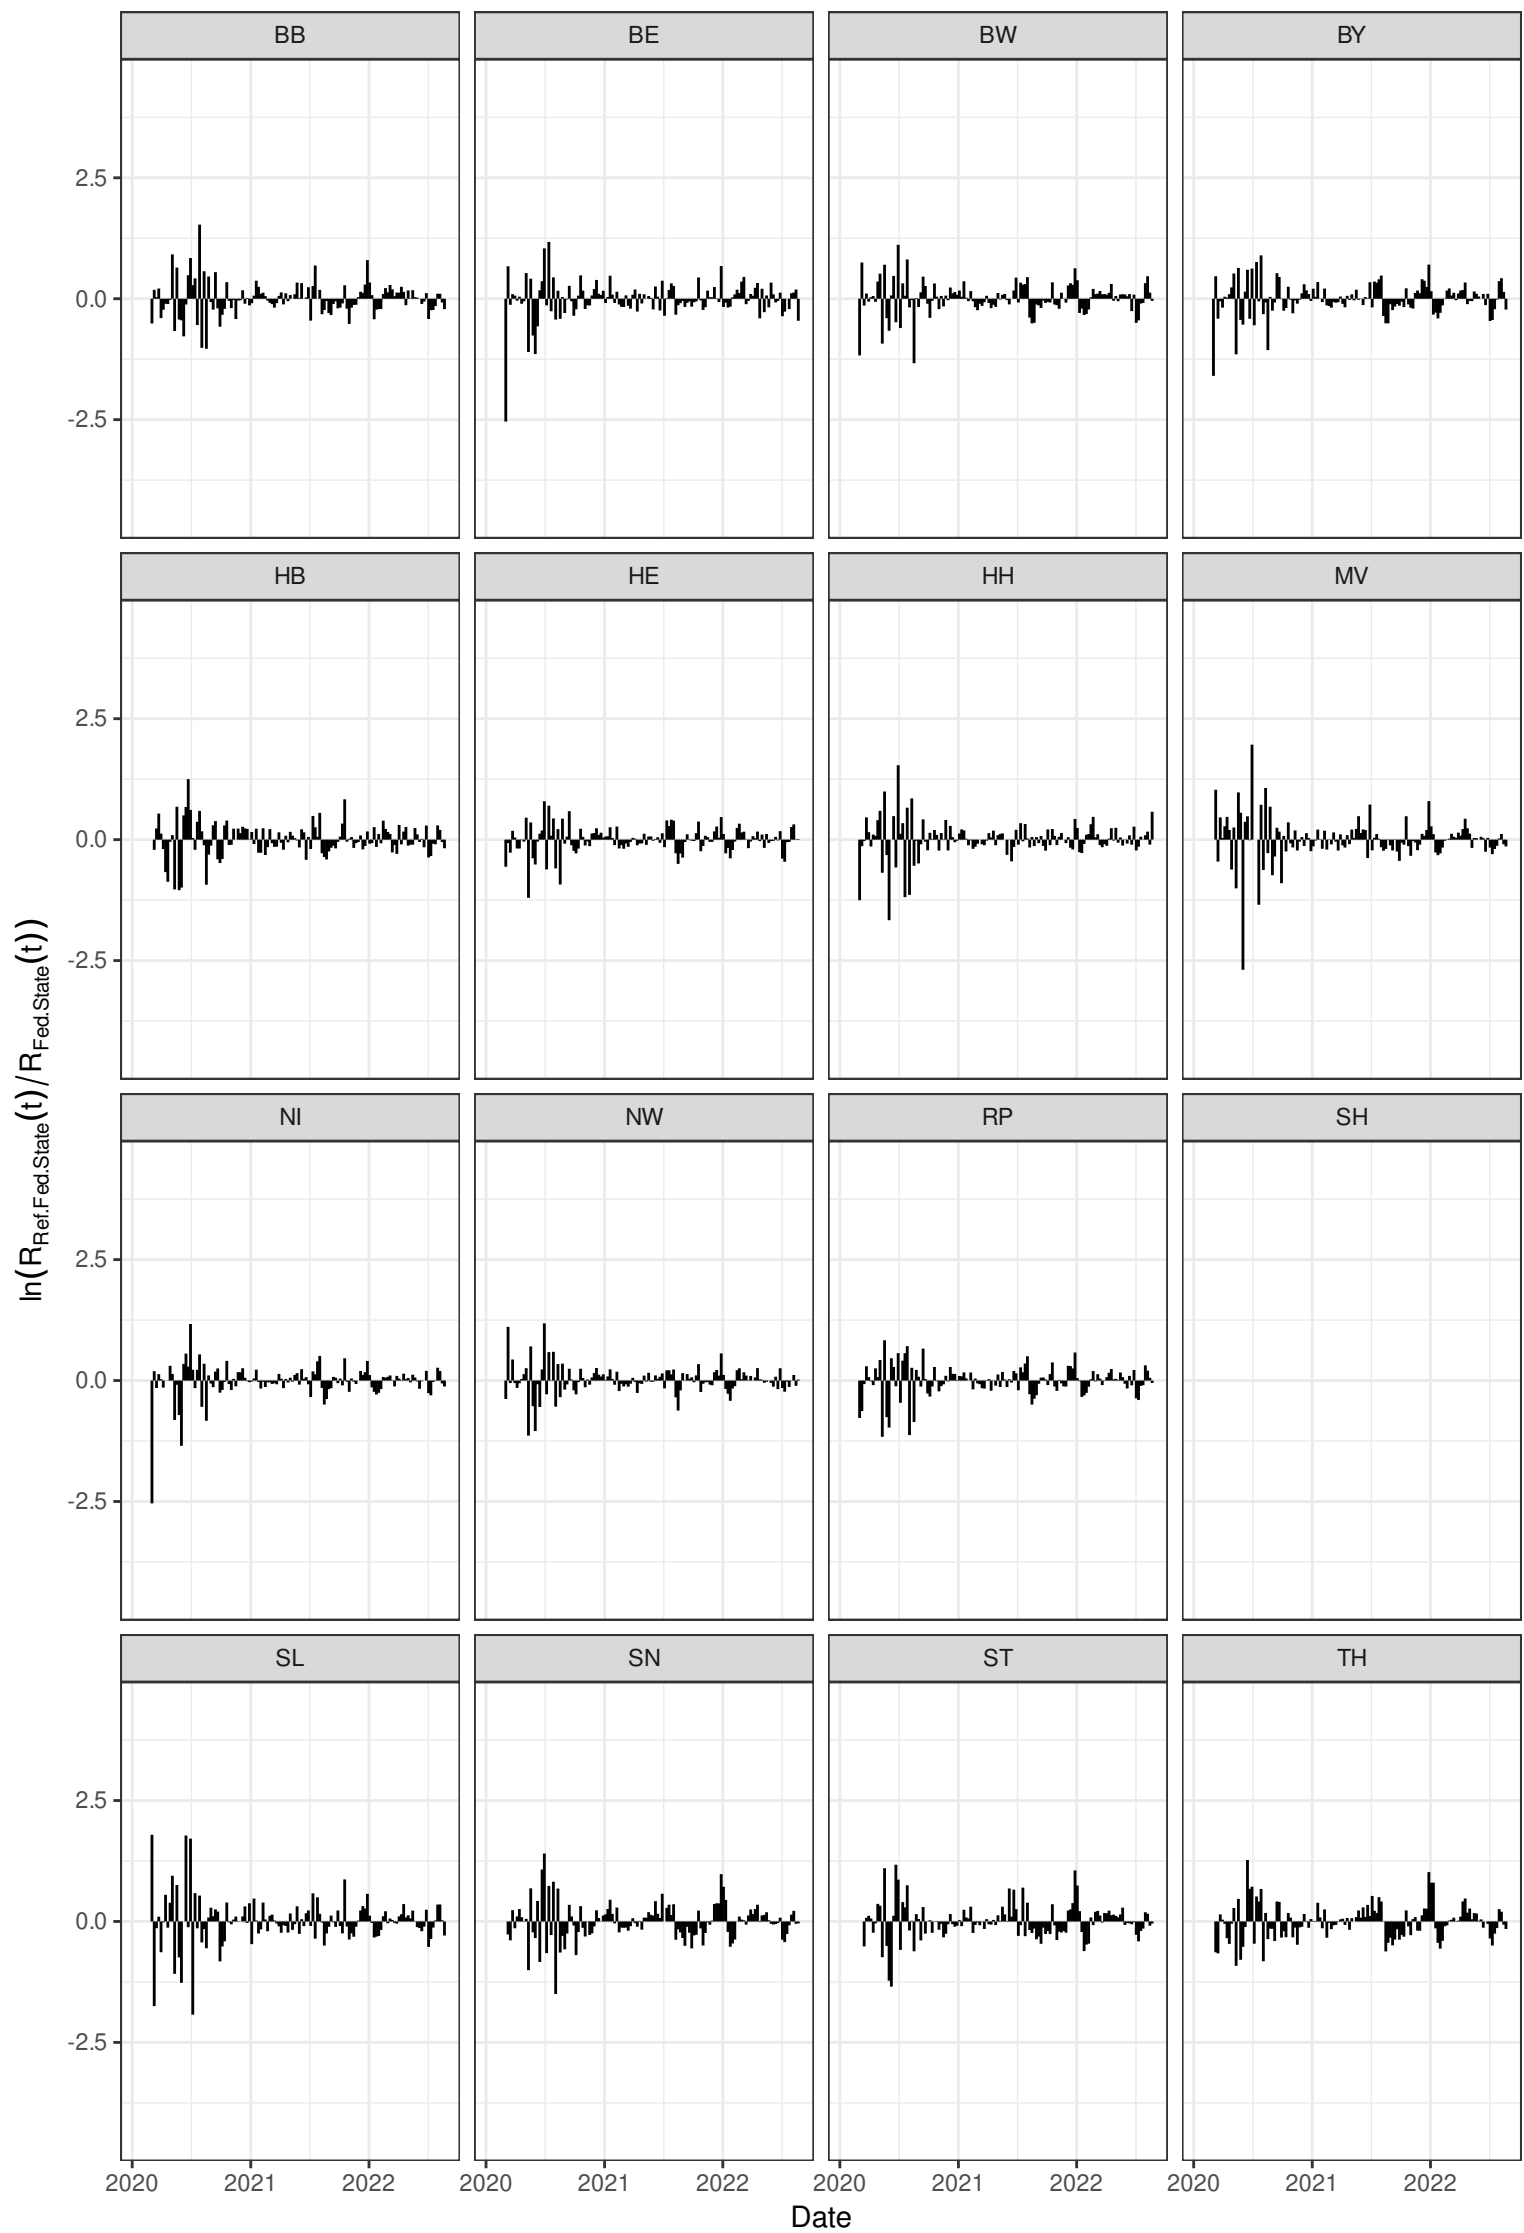

Reference State: SL

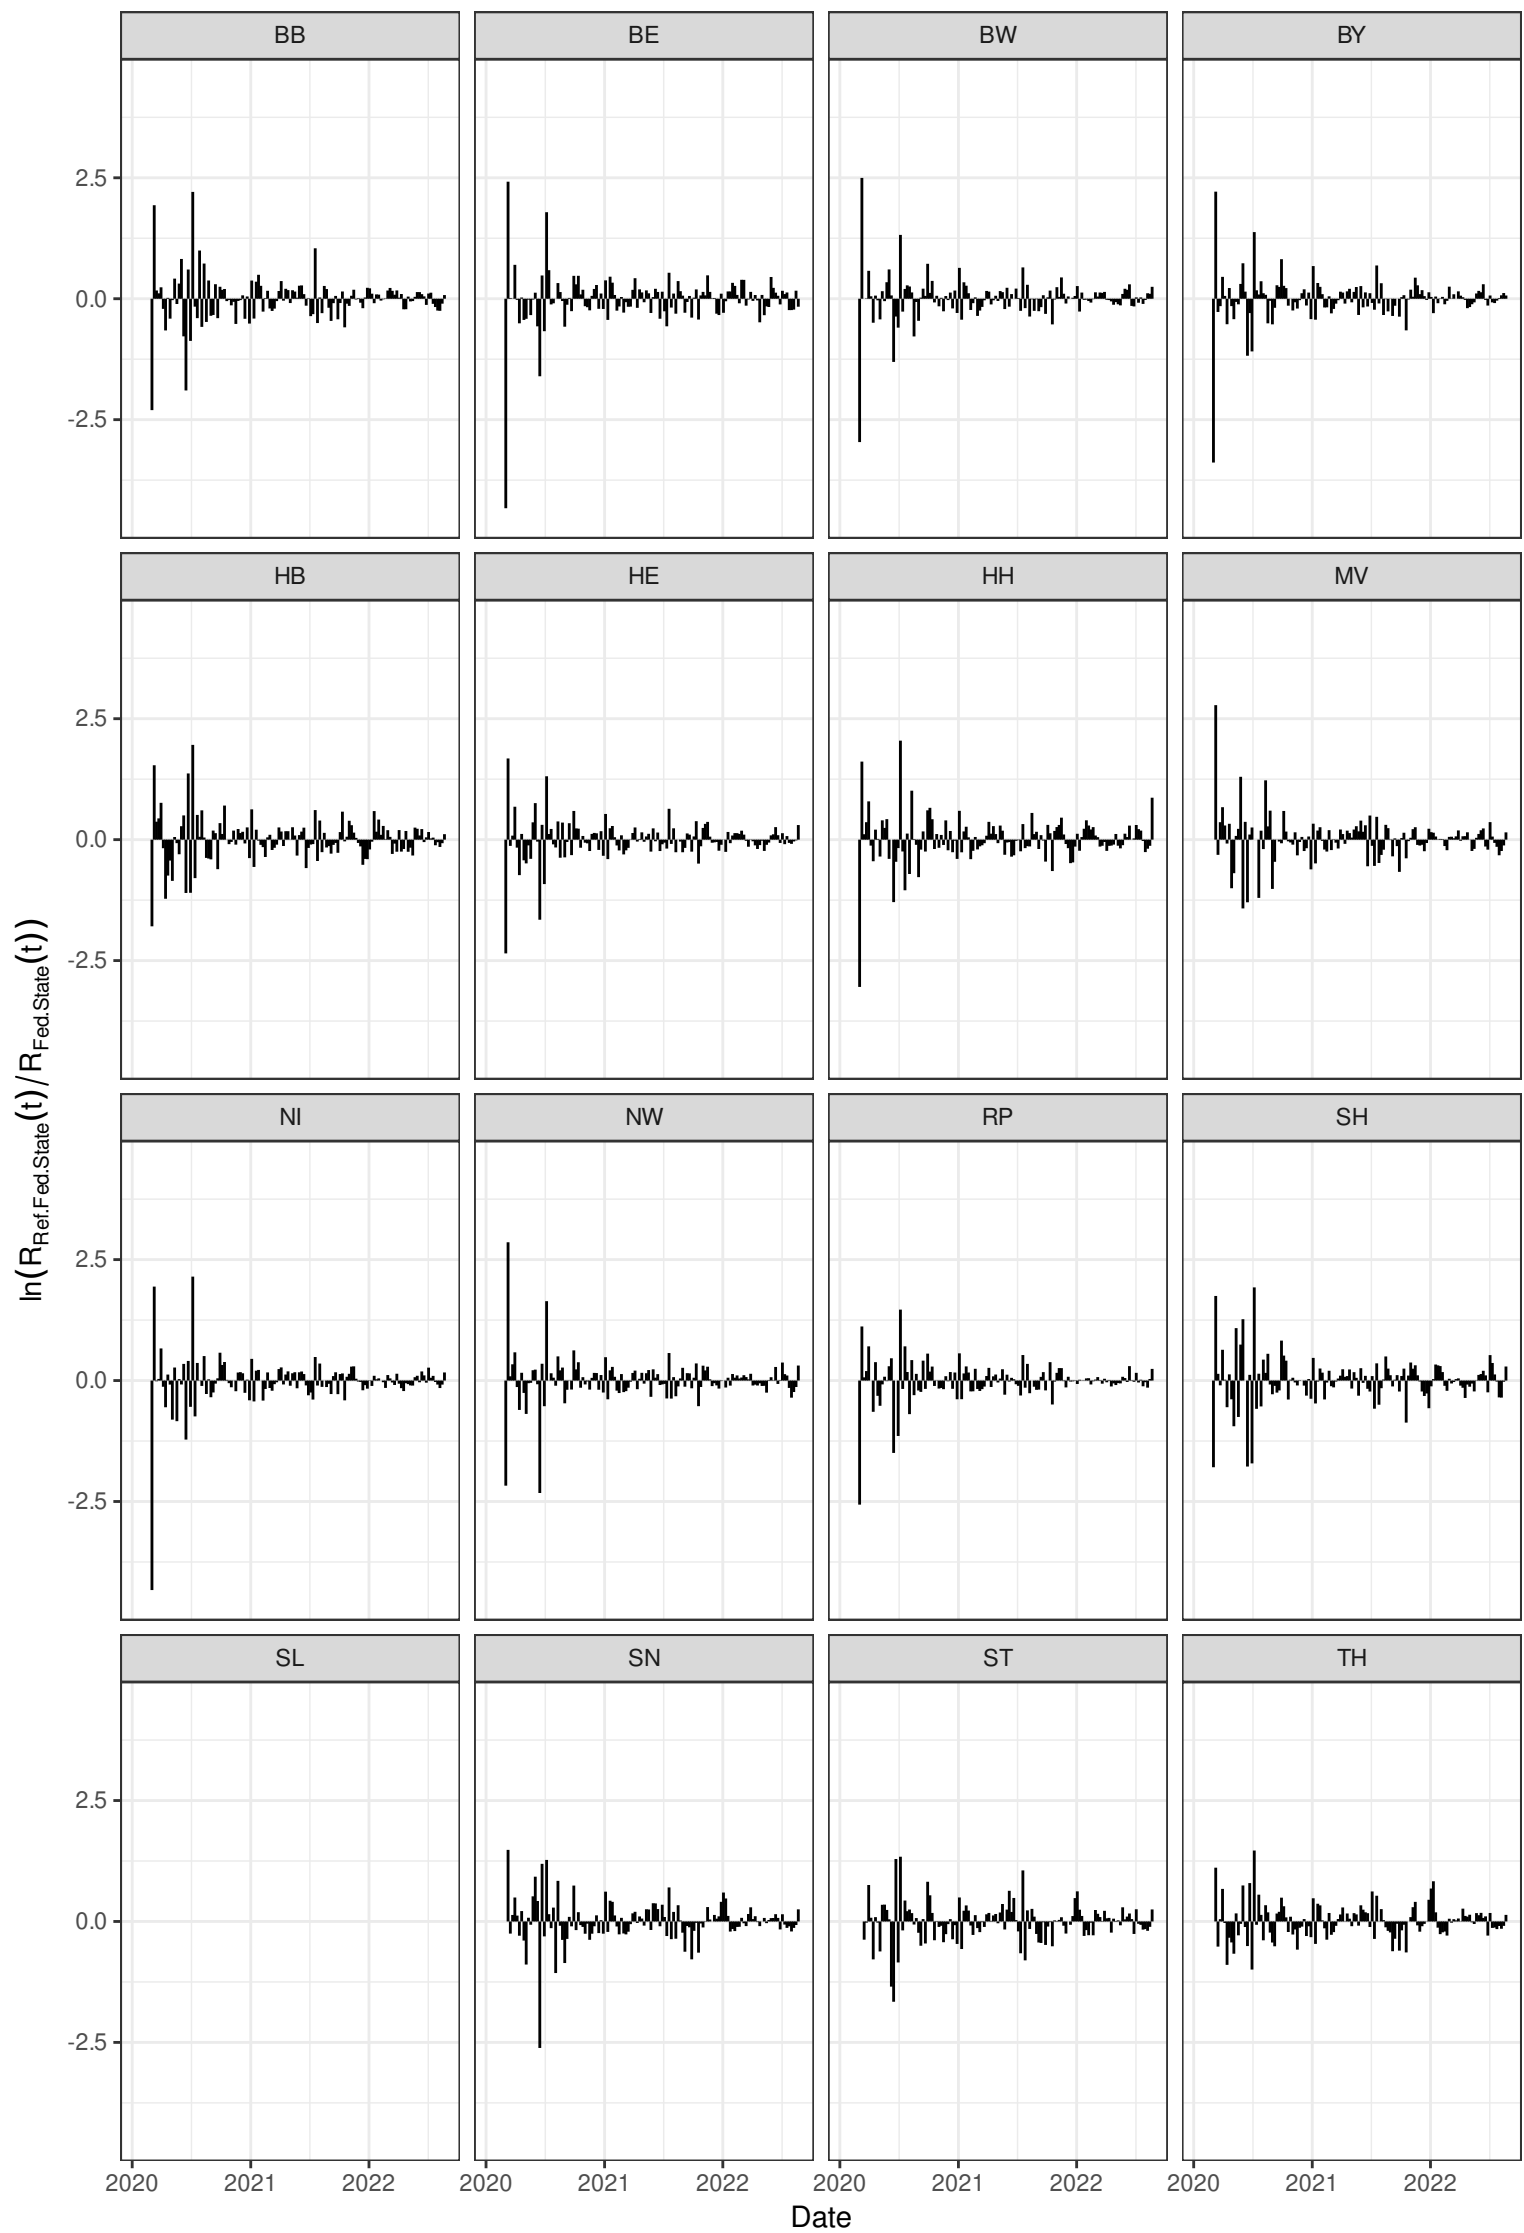

# Reference State: SN

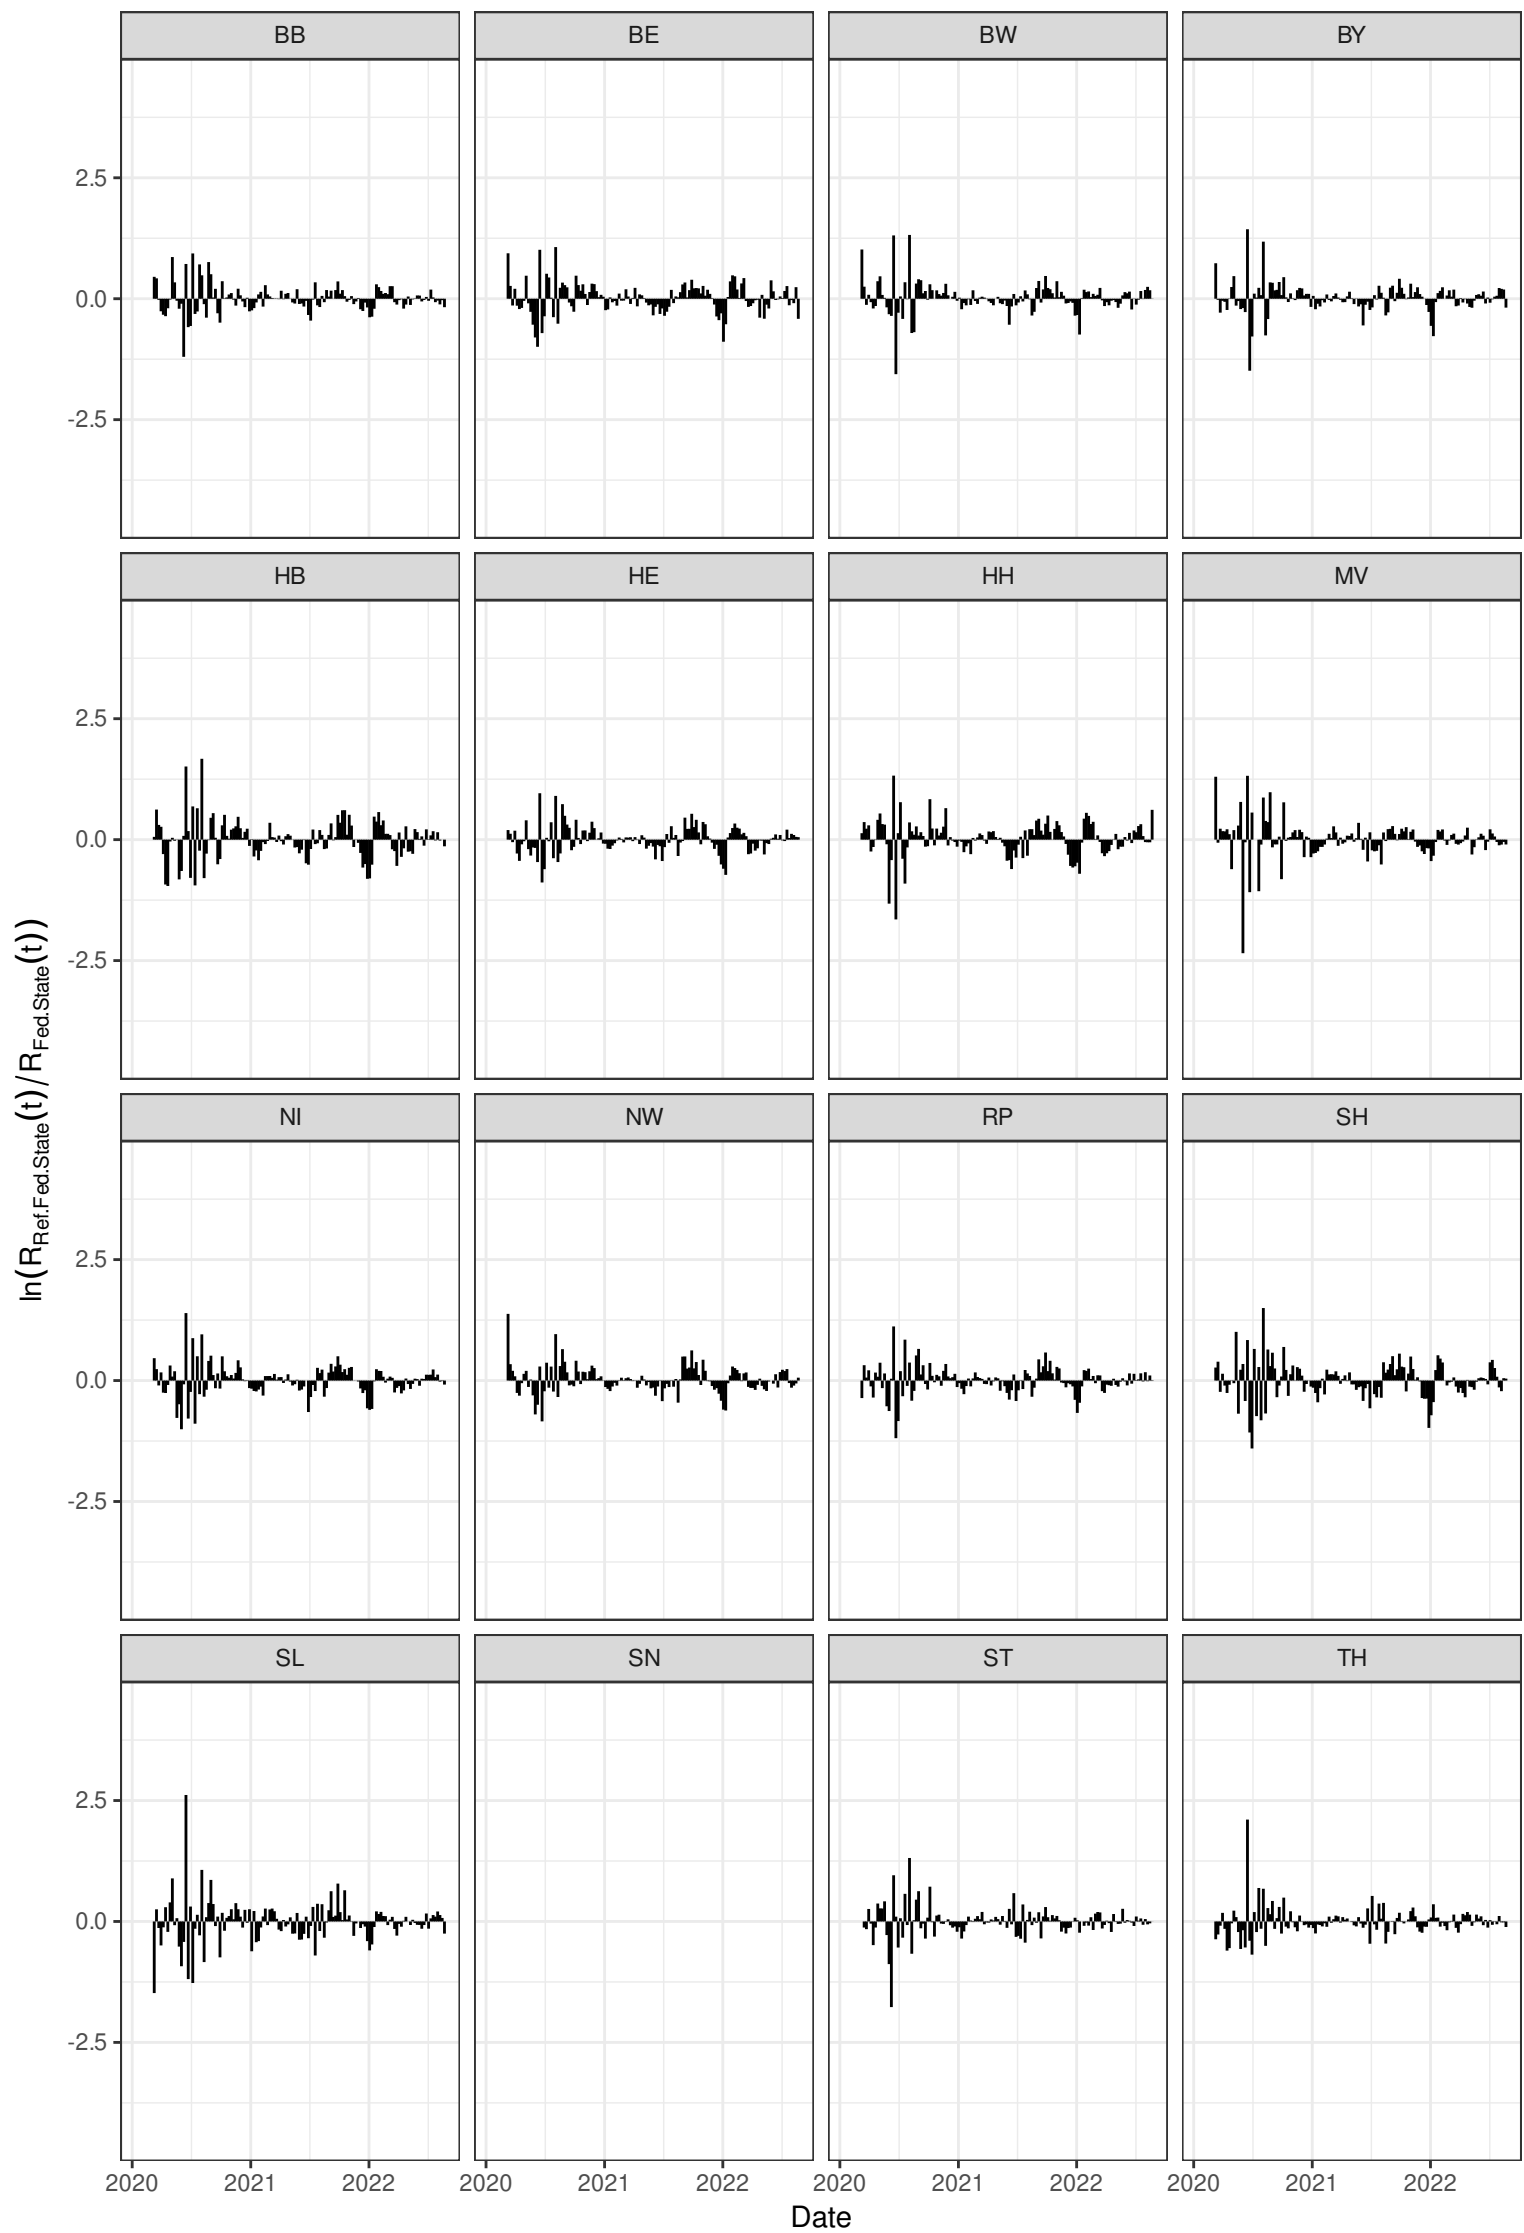

Reference State: ST

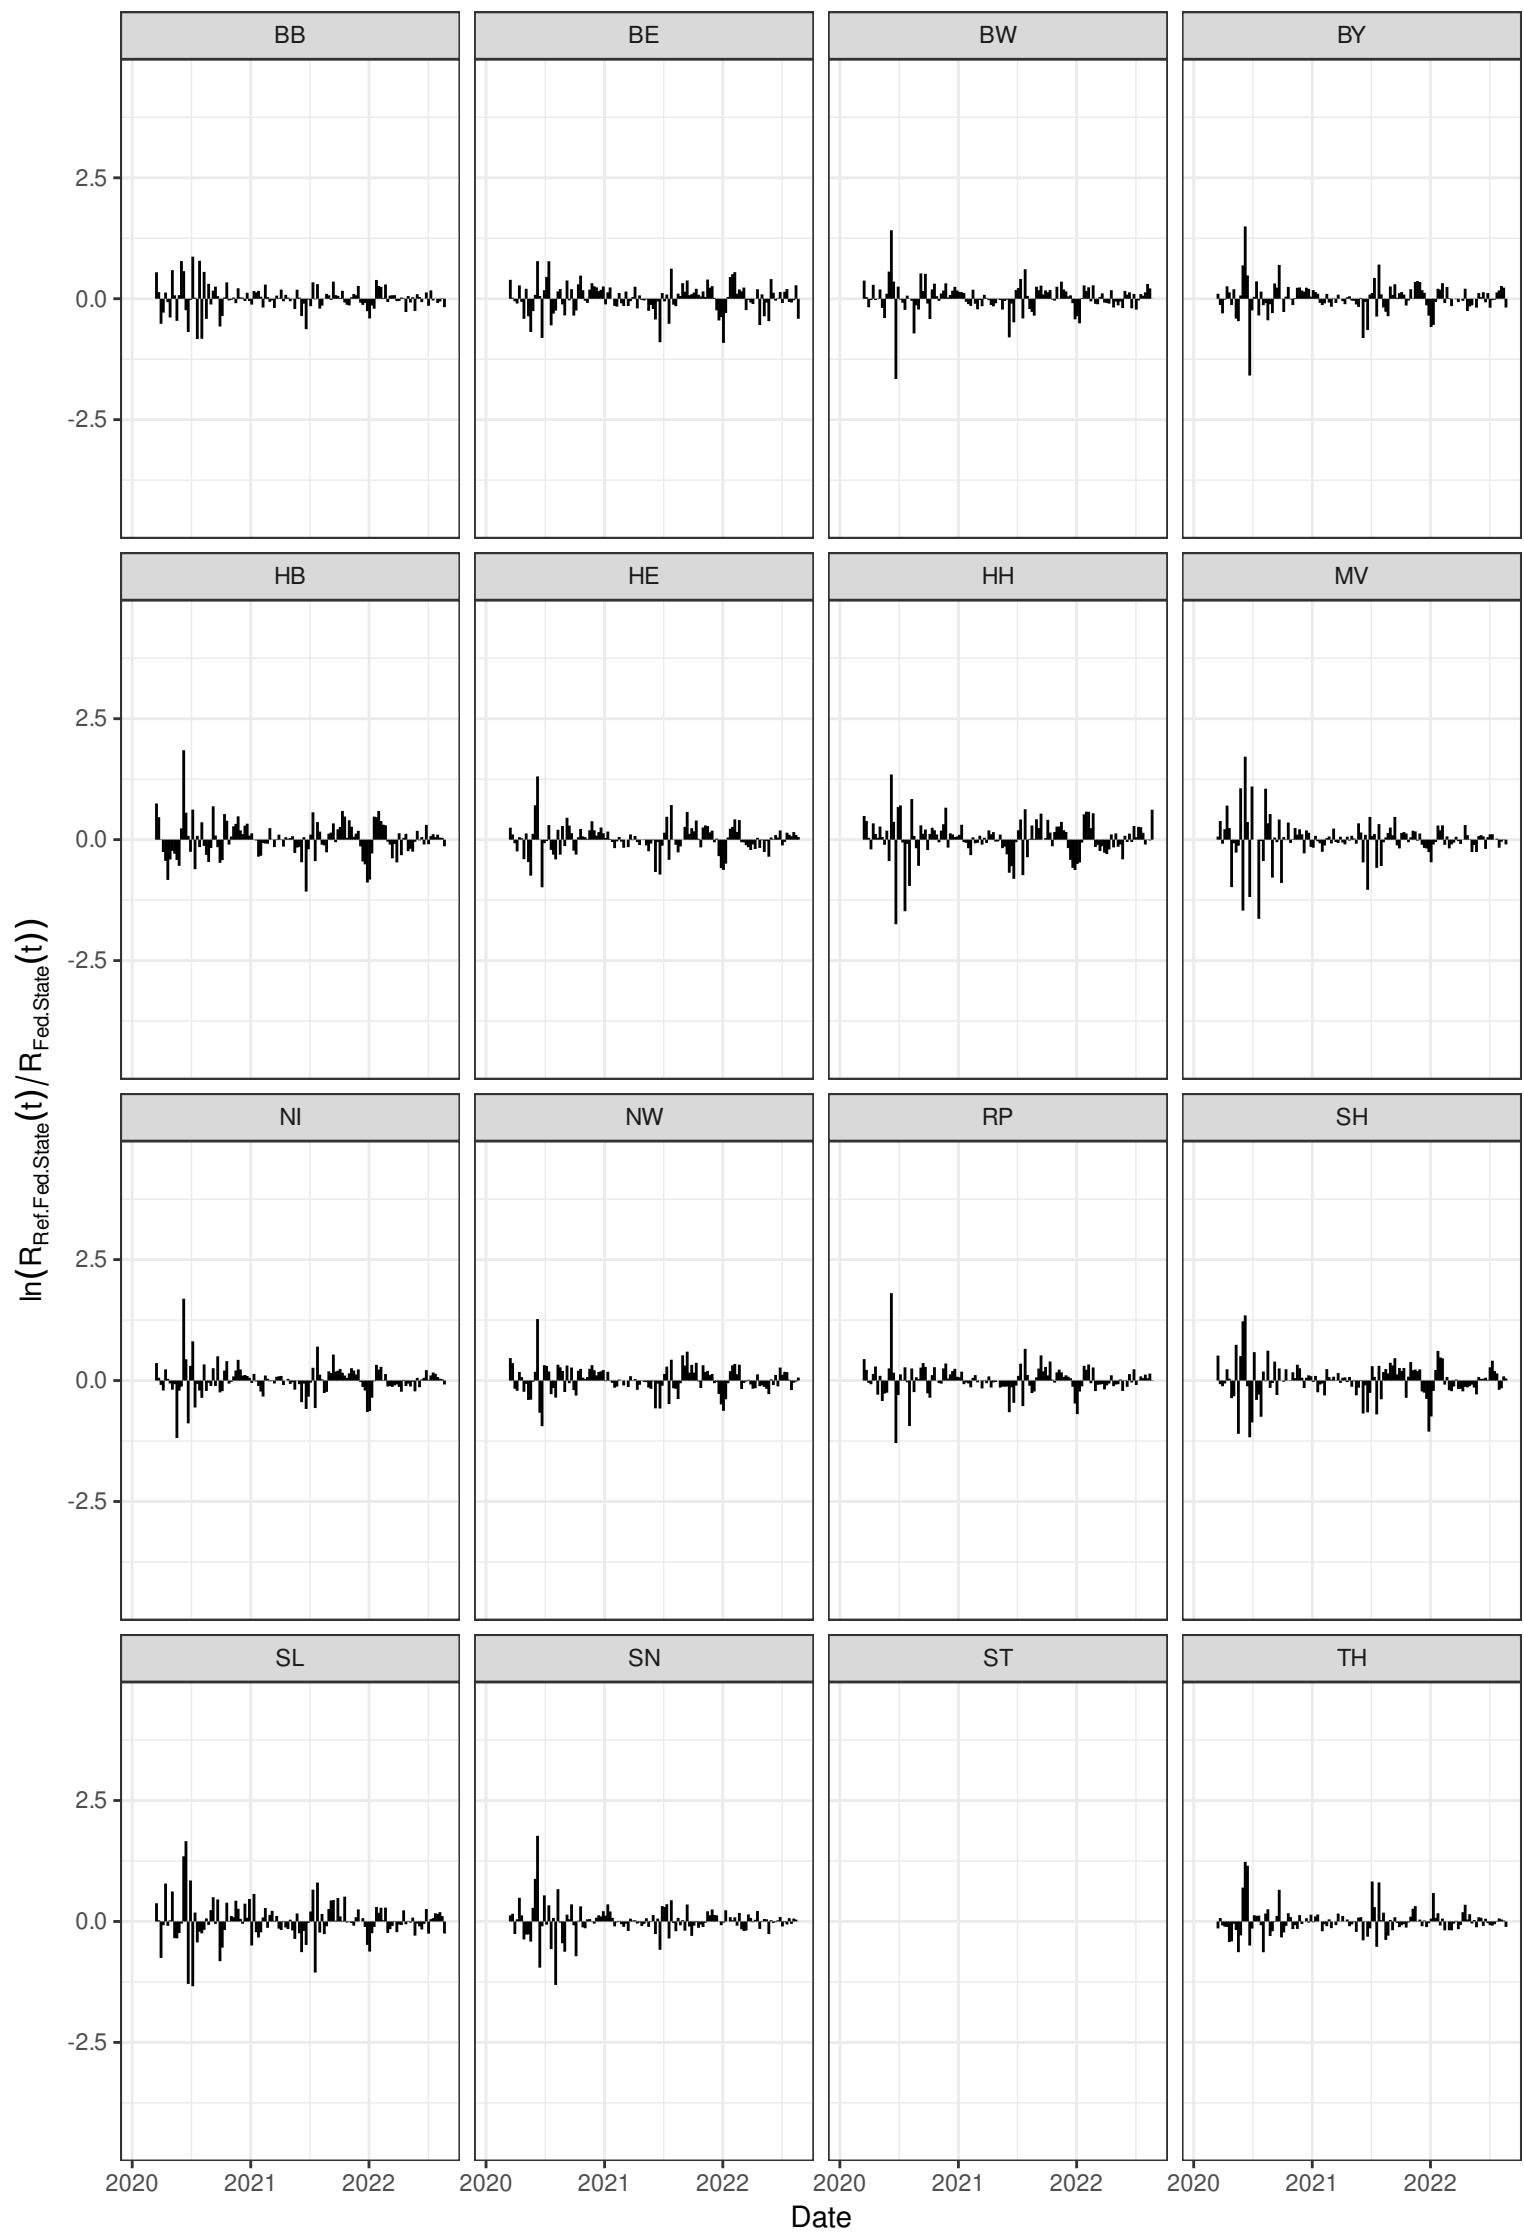

Reference State: TH

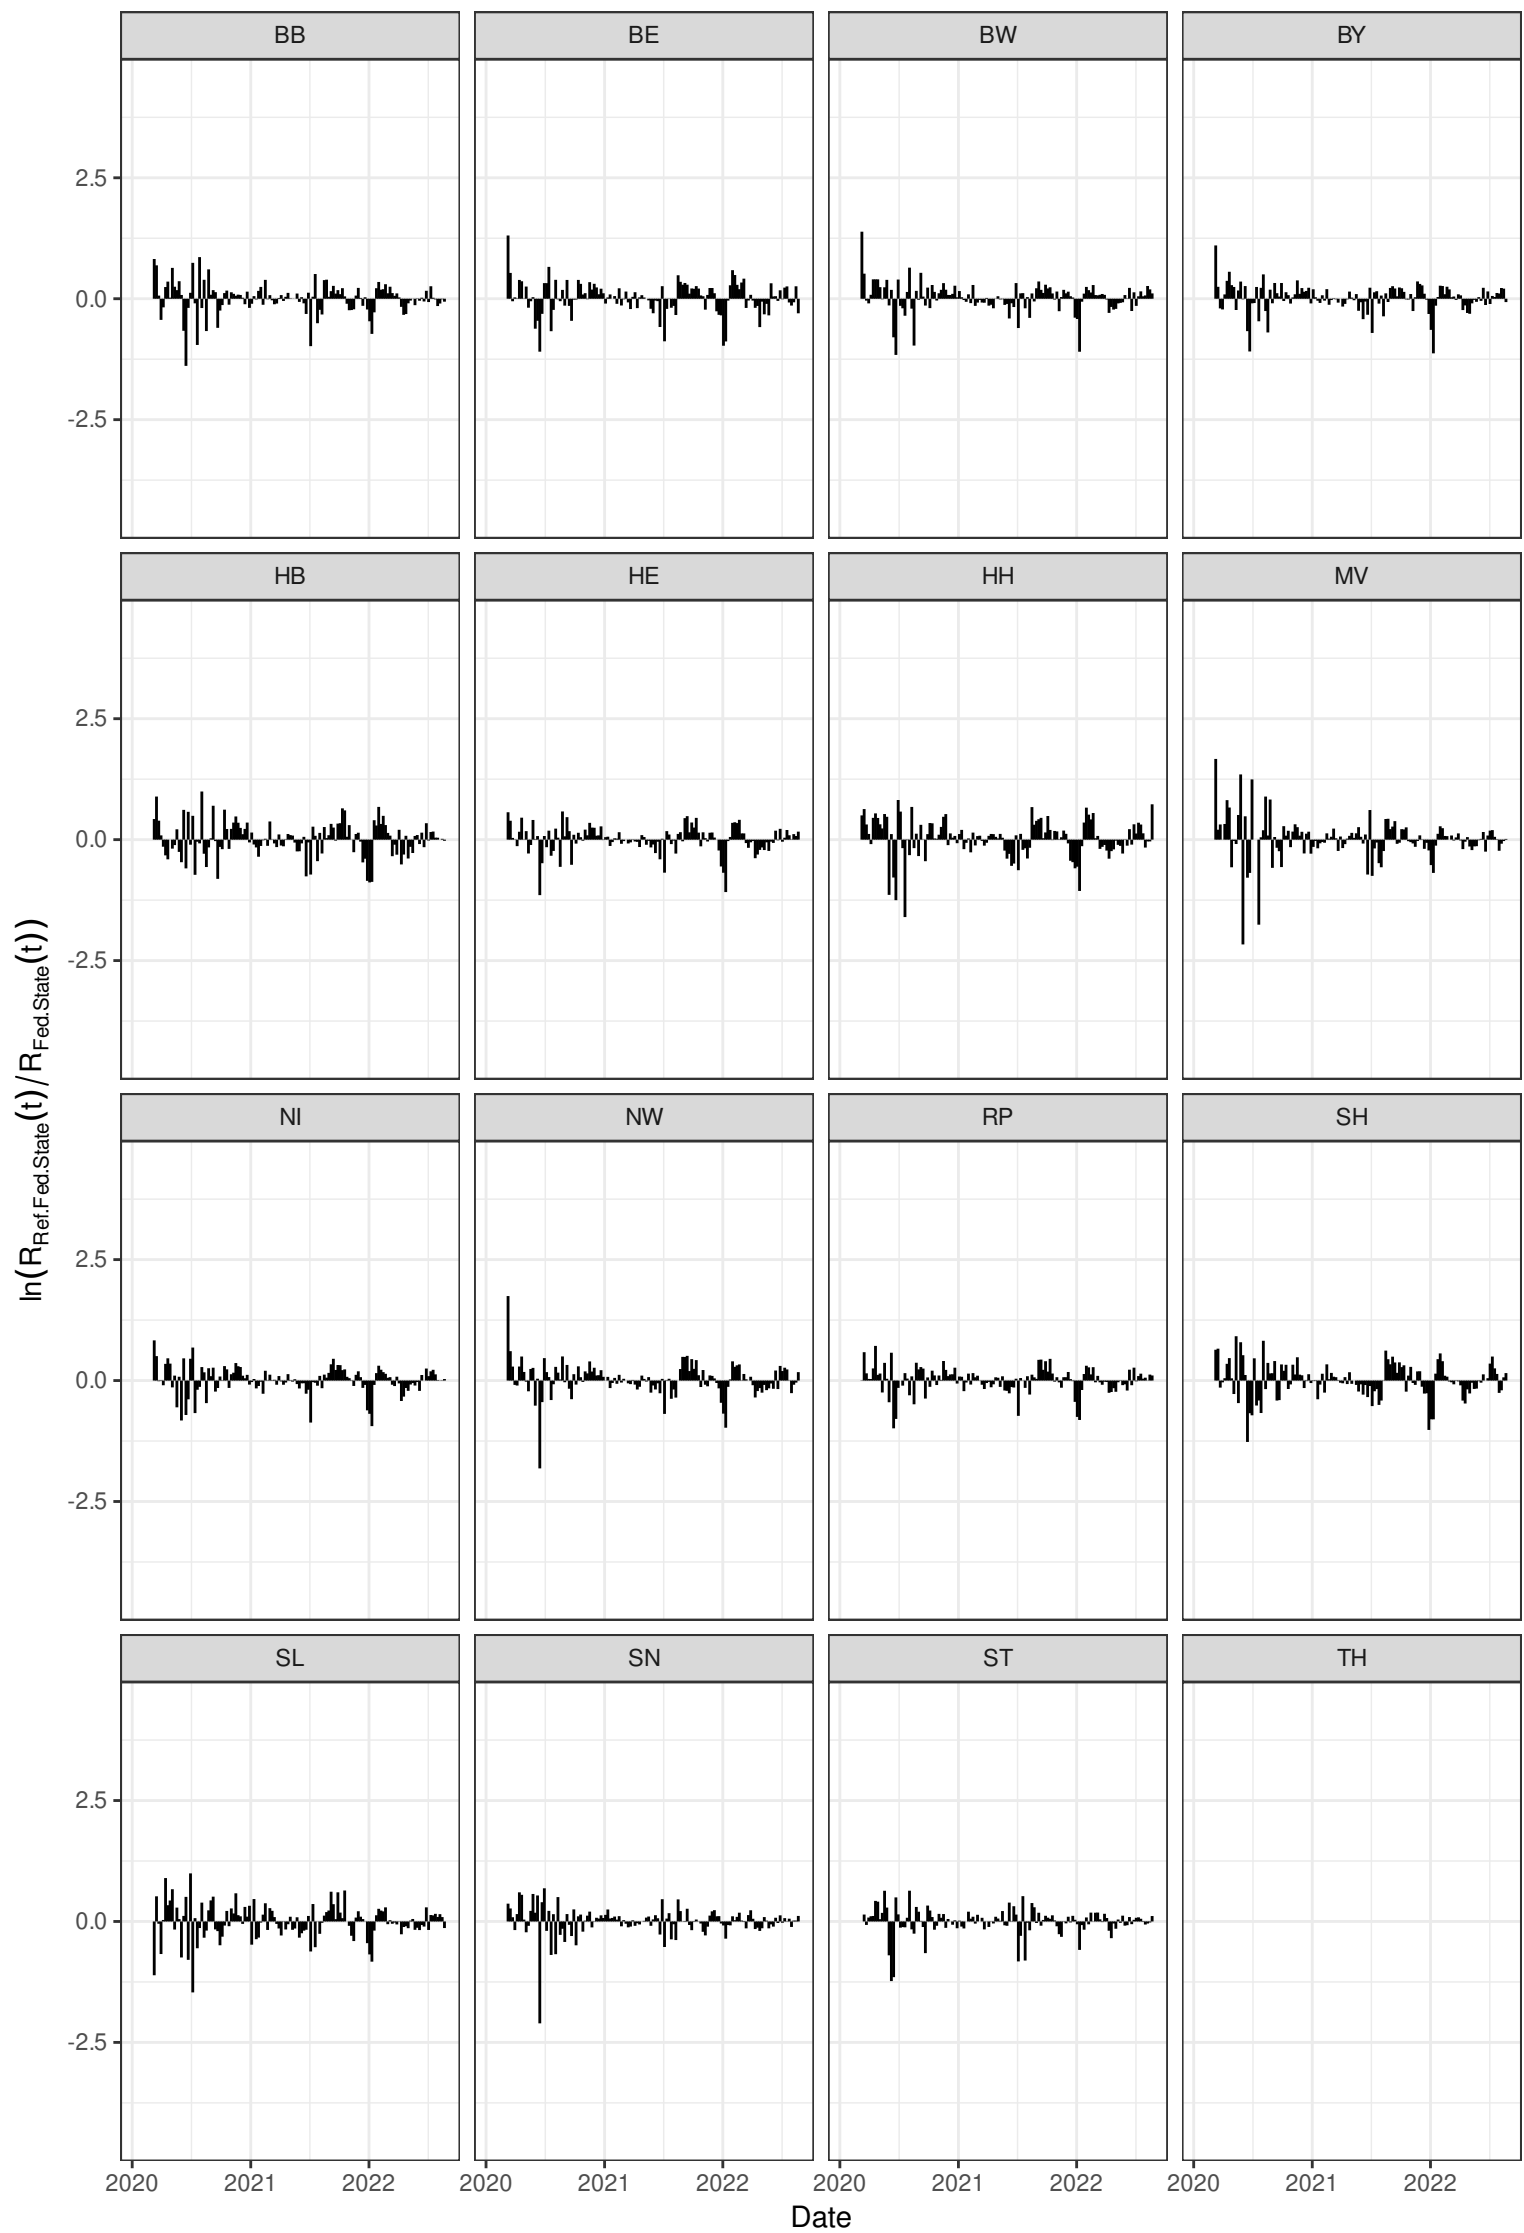

Supplement: Supplementary file 1 [file supplementary]
